# Supplementary material for: Tet2 deficiency in immune cells exacerbates tumor progression by increasing angiogenesis in a lung cancer model
Source: PubMed Central journal article supplement — Cancer Sci. 2021 Oct 28;112(12):4931–43. doi: 10.1111/cas.15165 (PMC8645781; doi:10.1111/cas.15165), 2021-10-28
Supplement: CAS-112-4931-s001.pdf [file CAS-112-4931-s001.pdf]

**SUPPLEMENTARY INFORMATION**

***Tet2*-deficiency in immune cells exacerbates tumor progression by increasing angiogenesis in a lung cancer model.**

Yen T.M. Nguyen<sup>1</sup>, Manabu Fujisawa<sup>2</sup>, Tran B. Nguyen<sup>2</sup>, Yasuhito Suehara<sup>3</sup>, Tatsuhiko Sakamoto<sup>2,3</sup>, Ryota Matsuoka<sup>4</sup>, Yoshiaki Abe<sup>1</sup>, Kota Fukumoto<sup>3</sup>, Keiichiro Hattori<sup>3</sup>, Masayuki Noguchi<sup>4</sup>, Daisuke Matsubara<sup>4,5</sup>, Shigeru Chiba<sup>2,3</sup>, and Mamiko Sakata-Yanagimoto<sup>2,3</sup>

## 12 SUPPLEMENTARY MATERIALS AND METHODS

### 13 Mice

14 Polyinosinic: polycytidylic (pIpC) (Sigma, code# P0913) was intraperitoneally injected into  
15 *Mx-Cre* x *Tet2<sup>lox/lox</sup>* and *Tet2<sup>lox/lox</sup>* mice at a dose 300µg/mouse every 2 days from day 2 after  
16 birth with 3 doses in total. *Tet2* gene is disrupted in all hematopoietic cells in pIpC-treated *Mx-*  
17 *Cre* x *Tet2<sup>lox/lox</sup>* mice. Female mice 6-8 weeks old were used for all experiments.

18

### 19 Lung cancer cell lines

20 LLC cells were expanded to enable injection into mice and for use in in vitro experiments. LLC  
21 cells with at least 4 passages were used for experiments. LLC cells that had been passaged  
22 more than 4 times were used for experiments.

23 The human lung cancer lines LC-Ad-1 and A549 were cultured in RPMI (Sigma-Aldrich,  
24 code# r8758) plus 10% FBS and 1% PS. One week after thawing, these cell lines that had been  
25 passaged more than 4 times were used for S100A8/A9 stimulation experiments.

26

### 27 Single cell suspensions from tumors

28 Tumors were resected at day 18, or when the largest tumors reached 1000 mm<sup>3</sup>. Tumors were  
29 first minced with surgical scissors and the digested enzymatically for 30 minutes at 37° in 5  
30 mL RPMI medium supplemented with 10% FCS and containing 0.75 mg/mL collagenase type  
31 IV (Gibco, 17104-019) and 0.05 mg/mL DNase I (Worthington, code# DP100). Cells were  
32 then passed through a 70 µm-strainer (Falcon, code# 352350) and then red blood cells were

lysed in ammonium-chloride-potassium buffer. Samples were centrifuged at 300 xg at 4°C for 5 minutes, supernatants were discarded, and pellets were resuspended in PBS containing 2% FCS (FACS buffer) to establish single-cell suspensions.

### **Flow cytometric analysis**

Antibodies used were: anti-B220 (eBioscience, clone RA3-6B2, code# 25-0452-82) for B cells; anti-Cd3 (eBioscience, clone 145-2C11, code# 17-0031-82), anti-Cd4 (eBiosciences, clone GK1.5, code# 25-0042-82), and anti-Cd8 (BioLegend, clone 53-6.7, code# 100707) for T cells; anti-Cd11b (BioLegend, clone M1/70, code# 101215), anti-Ly6c (BioLegend, clone HK1.4, code# 128005), anti-Ly6g (BioLegend, clone RB6-8C5, code# 108411) for GMD and MMD; anti F4/80 (eBiosciences, clone BM8, code# 17-4801-80) for TAMs; and anti-Emmprin (BioLegend, clone OX-114, code# 123705), anti-Cd44 (eBiosciences, clone IM7, code# 11-0441-81), and anti-Cd133 (eBiosciences, clone 13A4, code# 12-1331-80) for LLC cells. Cells were then washed twice with FACS buffer, stained with 7AAD Viability Staining Solution, and analyzed on FACS Aria II or III (BD Biosciences).

### **RNA extraction, cDNA synthesis and quantitative RT-PCR**

Total RNAs were isolated from sorted or cultured cells using an RNeasy Mini Kit (Qiagen, code# 74106), and RNA quality was determined by an Agilent 2100 Bioanalyzer using an Agilent RNA 6000 Pico Chip (Agilent, code# 5067-1513). cDNAs were synthesized using SuperScript™ III Reverse Transcriptase (10,000 units; Invitrogen, code# 18080-044). cDNA quantity and quality were assessed using a Qubit 4 Fluorometer (Thermo Fisher Scientific) and a Qubit™ dsDNA HS Assay Kit (Invitrogene, code# Q32851), respectively. Primers and

probes to determine expression levels of RNAs were TaqMan® Gene Expression Assays of Thermo Fisher Scientific Il1b (Mm00434228\_m1), S100a8 (Mm00496696\_g1), S100a9 (Mm00656925\_m1), Vegfa (Mm00437306\_m1), and TaqMan Ribosomal RNA Control Reagents for 18S ribosomal RNA (Thermo Fisher Scientific, code# 4308329). Quantitative RT-PCR (qPCR) was performed on a 7500 Real-Time PCR system (Applied Biosystems) using FastStart Universal Probe Master (Rox) (Roche, code# 38460200) according to manufacturer's instructions. Expression of targeted transcripts was normalized to that of *Rn18s*.

#### **Whole transcriptome analysis (WTA)**

Cells were sorted directly in RLT buffer of the RNeasy Mini Kit (Cat# 74106) and then total RNA was extracted.

#### **Reads alignment and differential expression analysis of WTA**

After quality control procedures, sequencing reads were mapped on the mm10 mouse reference genome using the CLC Genomics Workbench ver.11 (Qiagen). The reads per kilobase of exon model per million mapped reads (RPKM) value was calculated for each gene. The Differential Expression for WTA tool was used to perform a statistical differential expression test between *Tet2*<sup>-/-</sup> and *Tet2*<sup>+/+</sup> groups to identify DEGs between groups.

#### **Pathway and functional annotation analyses**

Gene set enrichment analysis (GSEA 4.1.0, <https://www.gsea-msigdb.org/gsea/index.jsp>) was applied to identify significantly enriched pathways in each group. Gene sets from Molecular Signatures Database (MSigDB 7.1) were used for analysis. Metascape

(<https://metascape.org/gp/index.html#/main/step1>) and DAVID Bioinformatics Resources 6.8 (<https://david.ncifcrf.gov>) were then applied for functional annotation of DEGs.

## **Single cell RNA sequencing (scRNA-seq)**

Cd45<sup>+</sup> immune cells were sorted from  $1 \times 10^7$  cells prepared from tumors from *Tet2*<sup>+/+</sup> or *Tet2*<sup>-/-</sup> mice using MACS Anti-APC MicroBeads (Miltenyi Biotec, code# 130-090-855) and APC anti-mouse Cd45 antibody (Invitrogen, clone 104, code# 47-0454-80), according to manufacturer's instruction. Library quality control and quantification were performed using a 2100 Bioanalyzer High Sensitivity DNA kit (Agilent, 5067-4626) and a KAPA Library Quantification Kit (Kapa Biosystems, code# KK4824). Sequencing reads were mapped to the mouse genome (build GRCm38) and demultiplexed using Cell Ranger pipelines (10x Genomics, version 3.0.2).

## **Data processing, integration and cell clustering**

Pre-processed data were further processed using R package *Seurat version 3.0 version* on RStudio (version 1.4). Genes related to ribosomes were removed. Cells with fewer than 200 unique feature counts, those with unique feature counts greater than 5000, and those with the number of mitochondrial genes > 5% were also removed. Data were normalized using the "NormalizeData" function and highly variable features were extracted using the "FindVariableFeatures" function. We then performed a linear transformation (scaling) and principal component analysis (PCA) based on variable features using the "RunPCA" function.

Canonical correlation analysis (CCA) (27) was performed to identify shared sources of variation across data of *Tet2*-deficient and WT Cd45<sup>+</sup> cells using the "FindIntegrationAnchors" function and integrate them using anchors using the "IntegrateData" function with canonical correlation dimensions of 20.

Graph-based clustering was then performed using “FindNeighbors” and “FindClusters” functions with the dimension of a reduction of 20, and resolution of 0.7. A non-linear dimensional reduction Uniform Manifold Approximation and Projection (UMAP) technique was used to visualize data using “RunUMAP” and “DimPlot” functions. Cell clusters were annotated based on expression of canonical markers, including *Itgam*, *Gsr*, *Ly6g*, *Ly6c2* and *Adgre1* for GMD, MMD and TAMs, *H2-Aa* and *H2-Eb1* for DCs, *Cd3e* for Lympho T cells and *Cd79a* for Lympho B cells. The top 5 markers of each cluster were determined to identify novel markers either highly or uniquely expressed in each cluster.

### **DEG analysis**

“FindMarkers” or “FindAllMarkers” functions were used to detect DEGs in each subcluster between *Tet2*-deficient and WT Cd45<sup>+</sup> cells, using the Wilcoxon Rank-Sum test and a minimum log fold-change in gene expression between *Tet2*-deficient and WT cells of 0.25. DEGs were defined as genes confirmed to show an adjusted p-value (based on the Bonferroni correction) of < 0.05.

### **Enzyme-linked immune sorbent assay (ELISA)**

To collect plasma, blood was taken from the superficial temporal vein into tubes containing 3 µL 0.5 mM EDTA, which were then centrifuged at 1000xg for 10 min at 4 °C. For cell culture, supernatants were collected and then re-centrifuged at 300xg for 10 min at 4 °C. Supernatants were transferred to new tubes and stored at -80 °C or assayed within one day.

S100a8, S100a9, Il1b, and Vegf were detected using mouse ELISA Kits for S100a8 (Abcam, code# ab213886), S100a9 (Abcam, code# ab213887), Il1b (Abcam, code# ab197742), Vegf (Abcam, code# Ab100751) based on the manufacturer’s protocol. A human VEGF

ELISA Kit (Abcam, code# 100662) was used to detect VEGF secreted from human lung cancer lines.

### **Proliferation assay**

A Cell Counting Kit (CCK)-8 assay (Dojindo, code# CK04-05) was used to measure proliferation, based on the manufacturer's instructions. To do so, 1,000 LLC cells were seeded into each well of 96-well flat plates (Corning, code# 3959) and then treated with a dilution series of recombinant mouse S100a8/a9 heterodimer protein (R&D, 8916-S8-050) at 0, 0.001, 0.003, 0.01, 0.04, 0.156, 0.625, and 2.5 µg/ml, with 3 replicates for each concentration. At indicated time points between 12 hours to 72 hours after treatment, 10 µL CCK-8 solution was added to each well, cells were incubated at 37°C for 2 hours, and then assayed using a Varioskan™ LUX multimode microplate reader (Thermo Fisher Scientific) at OD450.

### **Treatment of cancer lines in vitro**

1 x10<sup>5</sup> LLC cells cultured in 12 well-plates were treated with or without 1 µg/ml recombinant mouse S100a8/a9 heterodimer protein (R&D, code# 8916-S8-050). Supernatants were collected after 24 hours to determine Vegf protein levels. In other experiments, 5 x10<sup>5</sup> human cancer cells (LC-Ad-1 and A549) were similarly cultured, treated with recombinant human S100A8/A9 heterodimer protein (R&D, code# 8226-S8-050), and assayed for VEGF concentration.

To co-culture LLC cells with GMD cells, 5000 GMD were sorted from tumors of LLC-injected *Tet2*<sup>+/+</sup> or *Tet2*<sup>-/-</sup> mice and then cultured in wells of 96-well plates in which LLC cells had been previously cultured for 24 hours. Control wells contained only cultured LLC cells. After 24 hours, supernatants from all samples were collected to determine Vegfa protein levels. For Emmprin treatment, 1 hour after seeding GMD with LLC cells, anti-Emmprin antibody

(Cd147 monoclonal antibody functional grade; eBioscience, clone RL73, code# 16-1471-38) or isotype control (rat IgG2a kappa isotype control functional grade; eBioscience, clone BR2a, code# 16-4321-85) was added. After 24 more hours, supernatants were collected to determine Vegfa protein levels.

#### **Immunohistochemical and immunofluorescence staining of tumor sections**

Portions of tumors resected from LLC-injected *Tet2<sup>+/+</sup>* and *Tet2<sup>-/-</sup>* mice were fixed in 10% formalin for 24 hours at room temperature in 0.01 mol/L phosphate buffer (pH 7.2) and embedded in paraffin. Sections were stained with hematoxylin and eosin (H&E) and photographed using a Keyence BZ X710 microscope (Keyence Corporation, Osaka, Japan). Other tumor portions were frozen in OCT compound (Sakura Finetek Japan Co., code# 4583) in hexane (Wako, code# 082-00426), chilled on dry ice, and then stored at -80°C. OCT blocks were sliced into 5 µm sections at -12°C on a cryostat.

For immunohistochemistry staining of blood vessels, specimens were fixed with 4% formaldehyde for 10 min at RT, and then endogenous peroxidase was blocked using fresh 3% H<sub>2</sub>O<sub>2</sub> for 10 min at RT. Sections were stained by anti-Cd31 antibody (BD Biosciences, code# 12-1331-80) (diluted 1:100) using a M.O.M. Immunodetection kit (Vector Laboratory, code# BMK 22-02) for 30 min at RT and then incubated with the working solution of Biotinylated Anti-rat IgG from the kit (diluted 1:100) for 30 min at RT. Sections were then incubated with HRP-SA (Vector Laboratory, SA-5704-100) for 30 min at RT prior to addition of DAB (Dako, code# K3468) to detect the signal. Finally, sections were washed 10 minutes in tap water, counterstained with HE, dehydrated, coverslipped and then read on a Keyence (BZ-X710) microscope. Each specimen was viewed in 5 fields at 20x magnification and Cd31-positive areas were detected automatically using BZ-X Analyzer Software from Keyence (BZ-X710).

For immunofluorescent staining, sections were incubated with primary antibodies for 90 minutes at room temperature (RT). For Ly6g and Vegfa co-staining, anti-mouse-Ly6g (Thermo Fisher Scientific, code# 13-5931-85) (1:10) and anti-mouse-Vegfa (Abcam, code# ab46154) (1:100) antibodies were used. For Ly6g co-staining with S100a8, anti-S100a8 (Proteintech, code# 15792-1-AP) (1:200) and anti-Ly6g (eBioscience, code# 11-5931-82) (1:50) antibodies were used. For Ly6g co-staining with S100a9, anti-S100a9 (Proteintech, code# 14226-1-AP) (1:100) and anti-Ly6g (eBioscience, code# 11-5931-82) (1:100) antibodies were used. As secondary antibodies, goat anti-Rat IgG (H+L) Cross-Adsorbed Secondary Antibody, Alexa Fluor 488 (Thermo Fisher Scientific, code# A-11006) (1:1000) was used for Ly6g (Thermo Fisher Scientific, code# 13-5931-85) and goat anti-Rabbit IgG (H+L) Cross-Adsorbed Secondary Antibody, Alexa Fluor 594 (Thermo Fisher Scientific, code# A-11072) (1:1000) was used for Vegfa, S100a8 and S100a9 at RT for 30 minutes. After incubation with DAPI (Vector laboratories, code# H-1200), stained samples were photographed using a Leica TCS SP8 confocal laser scanning microscope (Leica Microsystems, Wetzlar, Germany).

## SUPPLEMENTARY NOTES

### **Pathway analysis reveals Il1b is a candidate upstream regulator of S100a8/S100a9 signaling**

To define factors that might regulate *S100a8/S100a9* in GMD cells, we performed Ingenuity Pathway Analysis (IPA) analysis using DEGs ( $p < 0.05$ ) from WTA of GMD. That analysis revealed that Il1b signaling could be upstream of S100a8/S100a9 activity (Figure S6A). RNA-seq data revealed that *Il1b* mRNA expression was significantly increased in *Tet2*-deficient relative to WT GMD and MMD (Figure S6B). Gene set enrichment analysis (GSEA) also showed that 6 pathways related to *Il1b* were enriched in *Tet2*-deficient compared to WT groups (Figures S6C,D). Gene ontology analysis of DEGs from WTA of GMD, MMD and TAMs

revealed that the pathway “cellular response to IL-1” was among the top 10 common enriched pathways, even from DEGs derived from scRNA-seq of Cd45<sup>+</sup> cells (Table S5, Figure S6E). qPCR analysis confirmed that *Il1b* mRNA expression was higher in *Tet2*-deficient GMD than in WT GMD (Figure S6F). Il1b protein levels in plasma were also higher in *Tet2*<sup>-/-</sup> relative to *Tet2*<sup>+/+</sup> mice (Figure S6G).

#### **Prognostic impact for human lung cancer patients.**

Using the Gene Expression Profiling Interactive Analysis (GEPIA) database, we then investigated the relationship between the genes encoding these mediators and their receptors and the prognosis of lung cancer patients: both adenocarcinoma and squamous cell carcinoma. In lung adenocarcinoma, patients showing high expression of S100A8, S100A9, EMMPRIN, or VEGFA showed a poor overall survival and disease free survival, respectively (Figure S7A). On the other hand, none of these factors served a predictive function in squamous cell lung cancer (Figure S7B).

#### **SUPPLEMENTARY FIGURES**

Figure S1

(A)

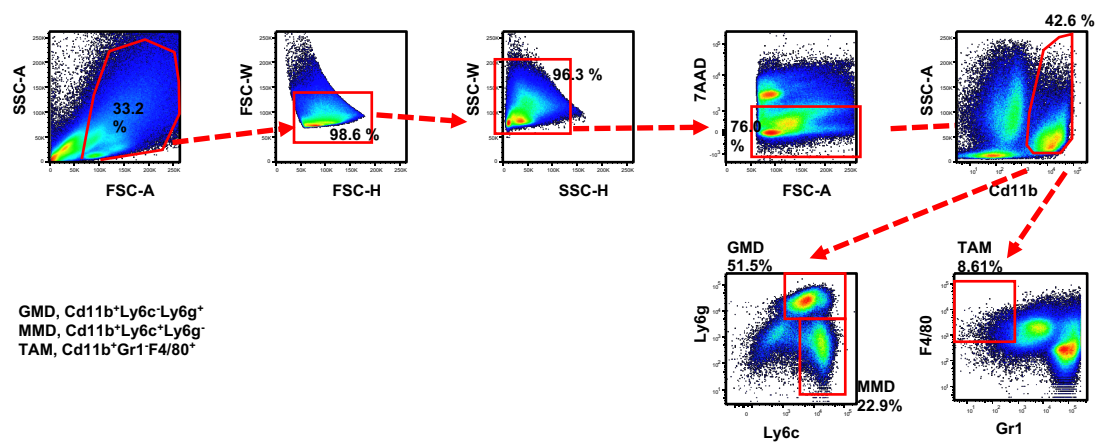

(B)

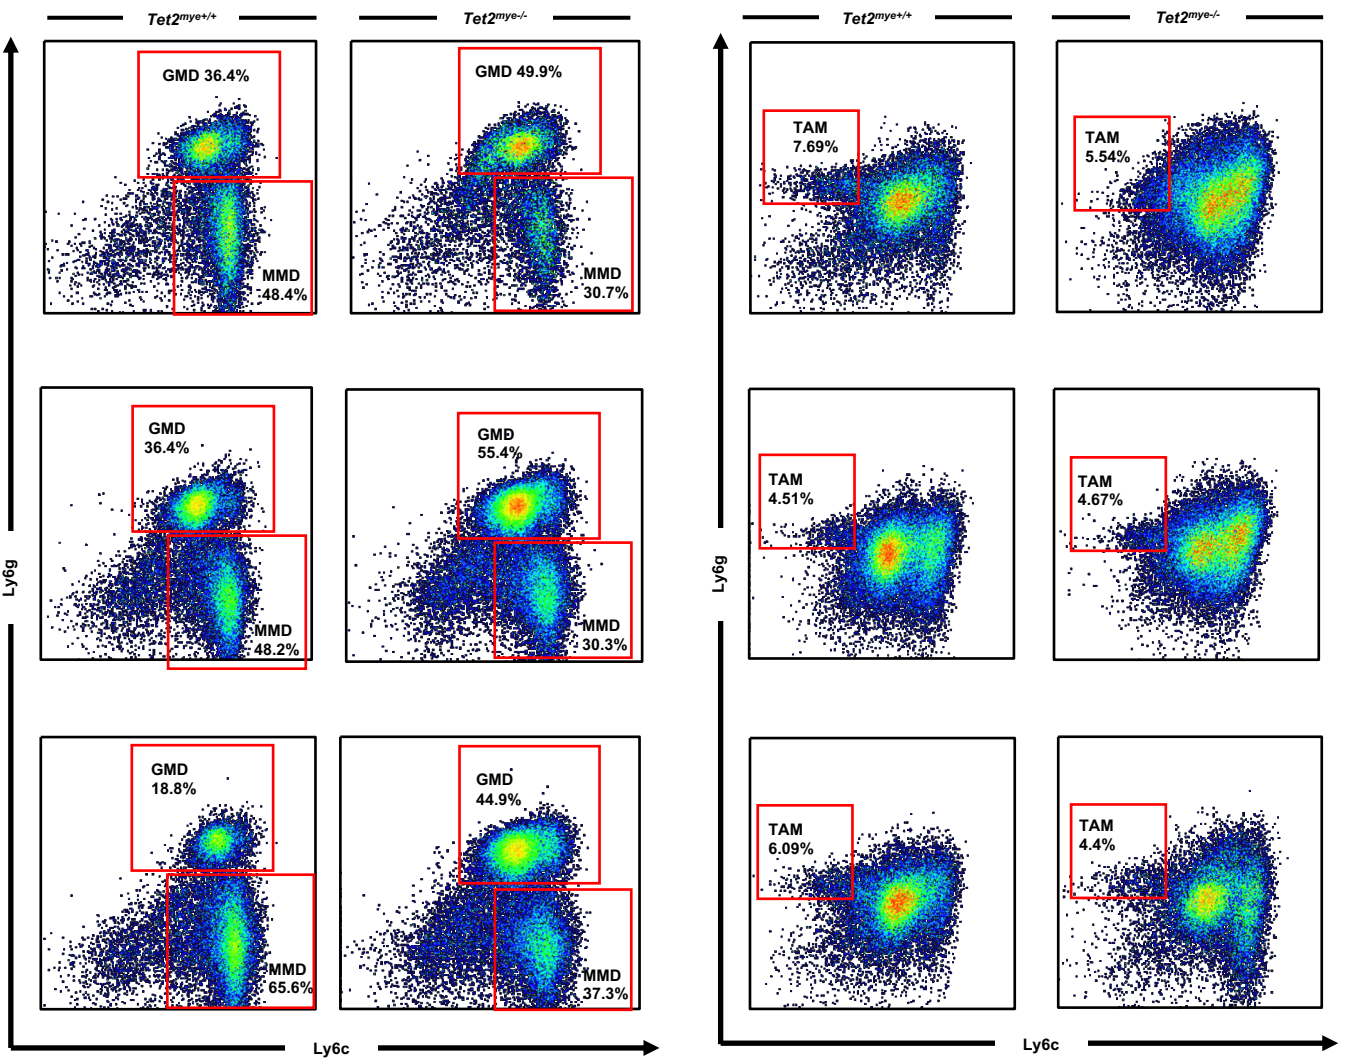

220 **Figure S1. *Tet2*-deficient immune cells enhance lung cancer progression in mice.**

221 A, Illustration of gating strategy used to isolate myeloid populations in tumors. GMD,  
222 CD11b<sup>+</sup>Ly6C<sup>-</sup>Ly6G<sup>+</sup>; MMD, CD11b<sup>+</sup>Ly6<sup>+</sup>Ly6G<sup>-</sup>; TAMs, CD11b<sup>+</sup>Gr1<sup>-</sup>F4/80<sup>+</sup>.

223 B, Representative flow cytometry plots: percentages of GMD, MMD and TAMs among  
224 Cd11b<sup>+</sup> subsets from tumors. *Tet2*<sup>mye<sup>+/+</sup></sup>, n=3; *Tet2*<sup>mye<sup>-/-</sup></sup>, n=3.

225

226

Figure S2

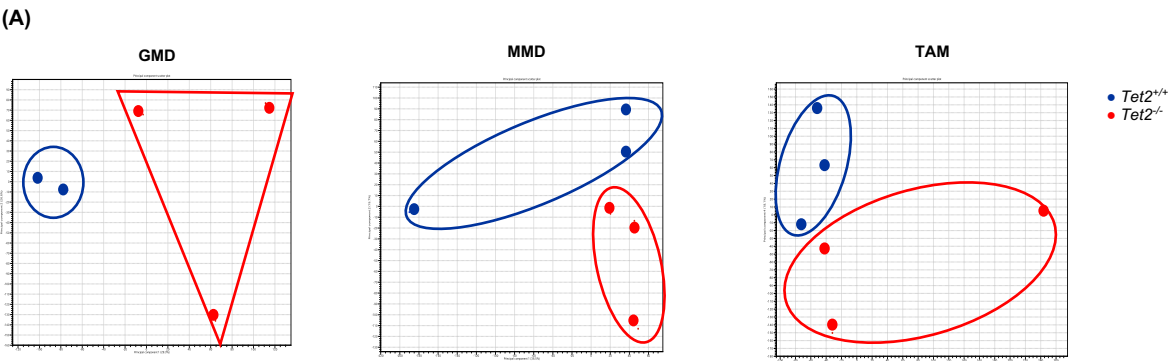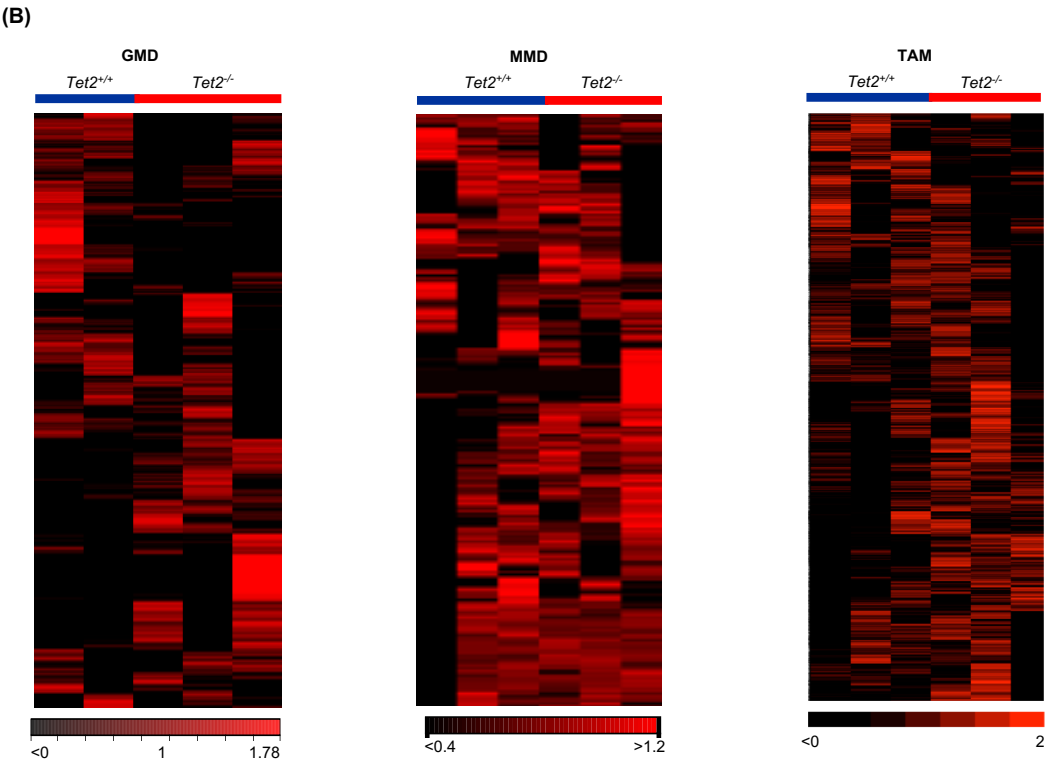

**Figure S2. Whole transcriptome analysis (WTA) reveals candidate mediators of LLC growth expressed in *Tet2*-deficient myeloid cells.**

A, PCA plots for WTA of *Tet2*-deficient and WT GMD, MMD and TAMs.

B, Heatmaps of unsupervised clustering of genes differentially expressed in *Tet2*-deficient relative to WT GMD, MMD and TAMs. Colors from black to bright red indicate gene expression from low to high; color scale shows log2 expression values. *Tet2*-deficient and WT groups were analyzed as 2 separate groups for each fraction.

Figure S3

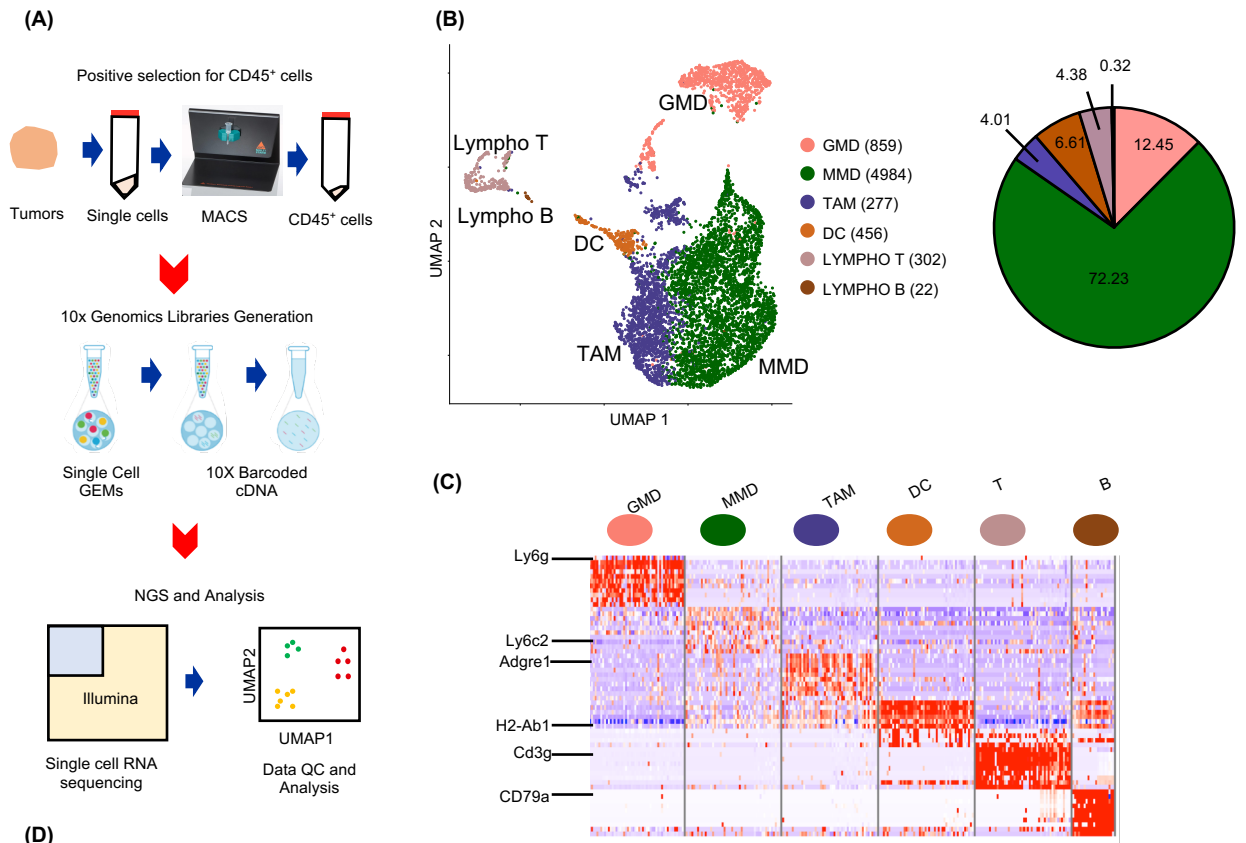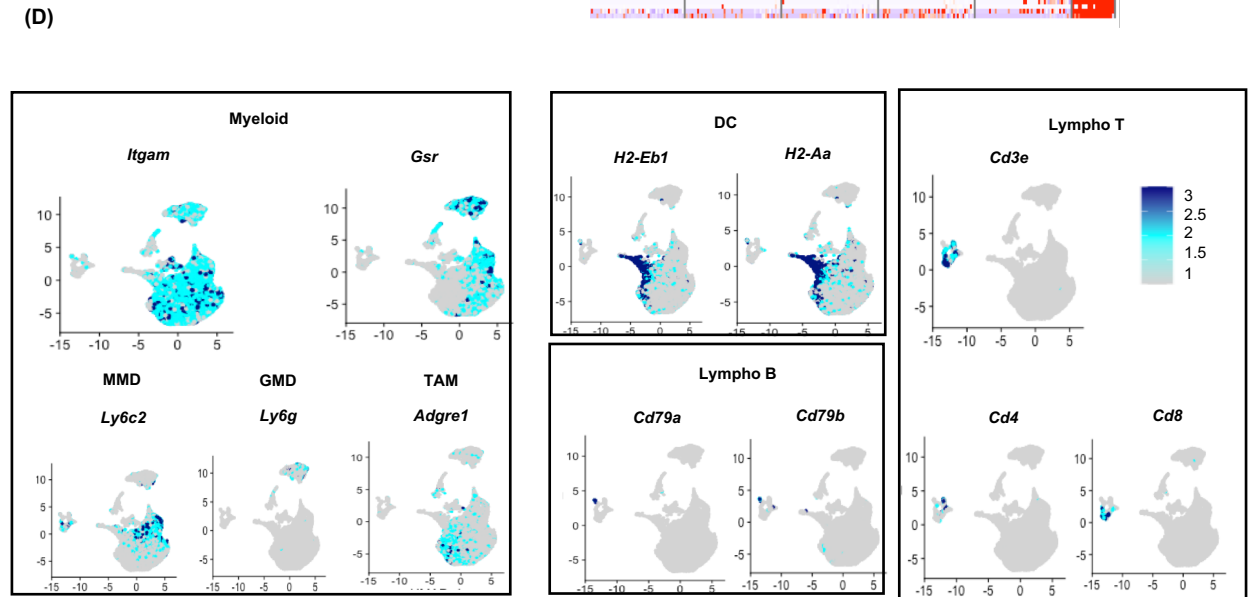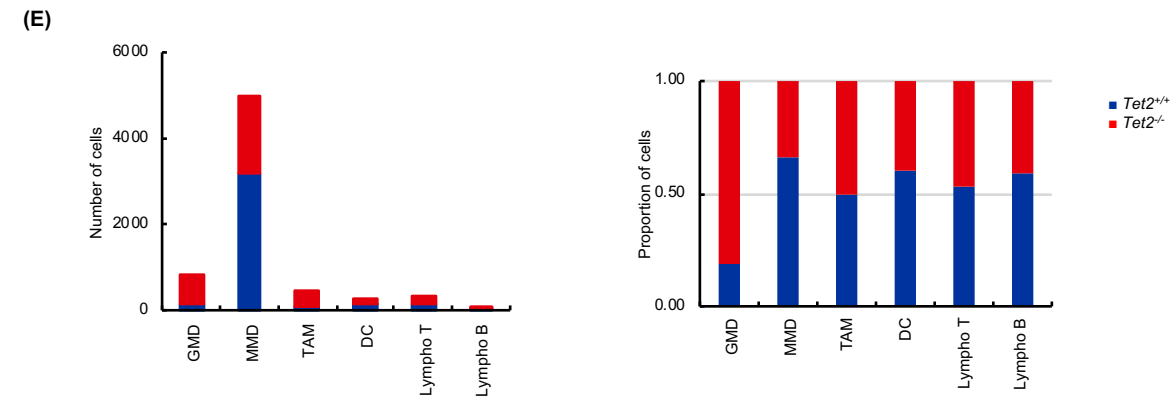

**Figure S3. Flowchart of single-cell transcriptome analysis to identify comprehensive immune-cell profiles and candidate growth mediators in *Tet2*-deficient GMD.**

A, Overview of workflow for scRNA-seq performed in this study. MACS, Magnetic-activated cell sorting; GEM, Gel Bead-in-Emulsion; NGS, next-generation sequencing; QC, Quality Control.

B, A UMAP plot after integration of *Tet2*-deficient and WT Cd45<sup>+</sup> immune cells from tumors (left). Six clusters corresponding to 6 cell types are labeled using different colors and the number of cells in each cluster is shown. Pie graph shows the proportion of cells in each cluster among total cells (right).

C, Heatmap of the top 10 conserved markers of each cell type.

D, Feature plots of common markers used to classify each cell type. Myeloid cells were divided into MMD, GMD and TAMs by *Itgam* (Cd11b), *Gsr* (Gr1), *Ly6c2*, *Ly6g* and *Adgre1* (F4/80). DCs were identified by *H2-Eb1* and *H2-Aa* (MHC-II markers), Lympho Ts by *Cd3e*, *Cd4* and *Cd8a*, and Lympho Bs by *Cd79a* and *Cd79b*.

E, Bar charts indicate cell number (left) and proportions (right) of 6 cell types.

Figure S4

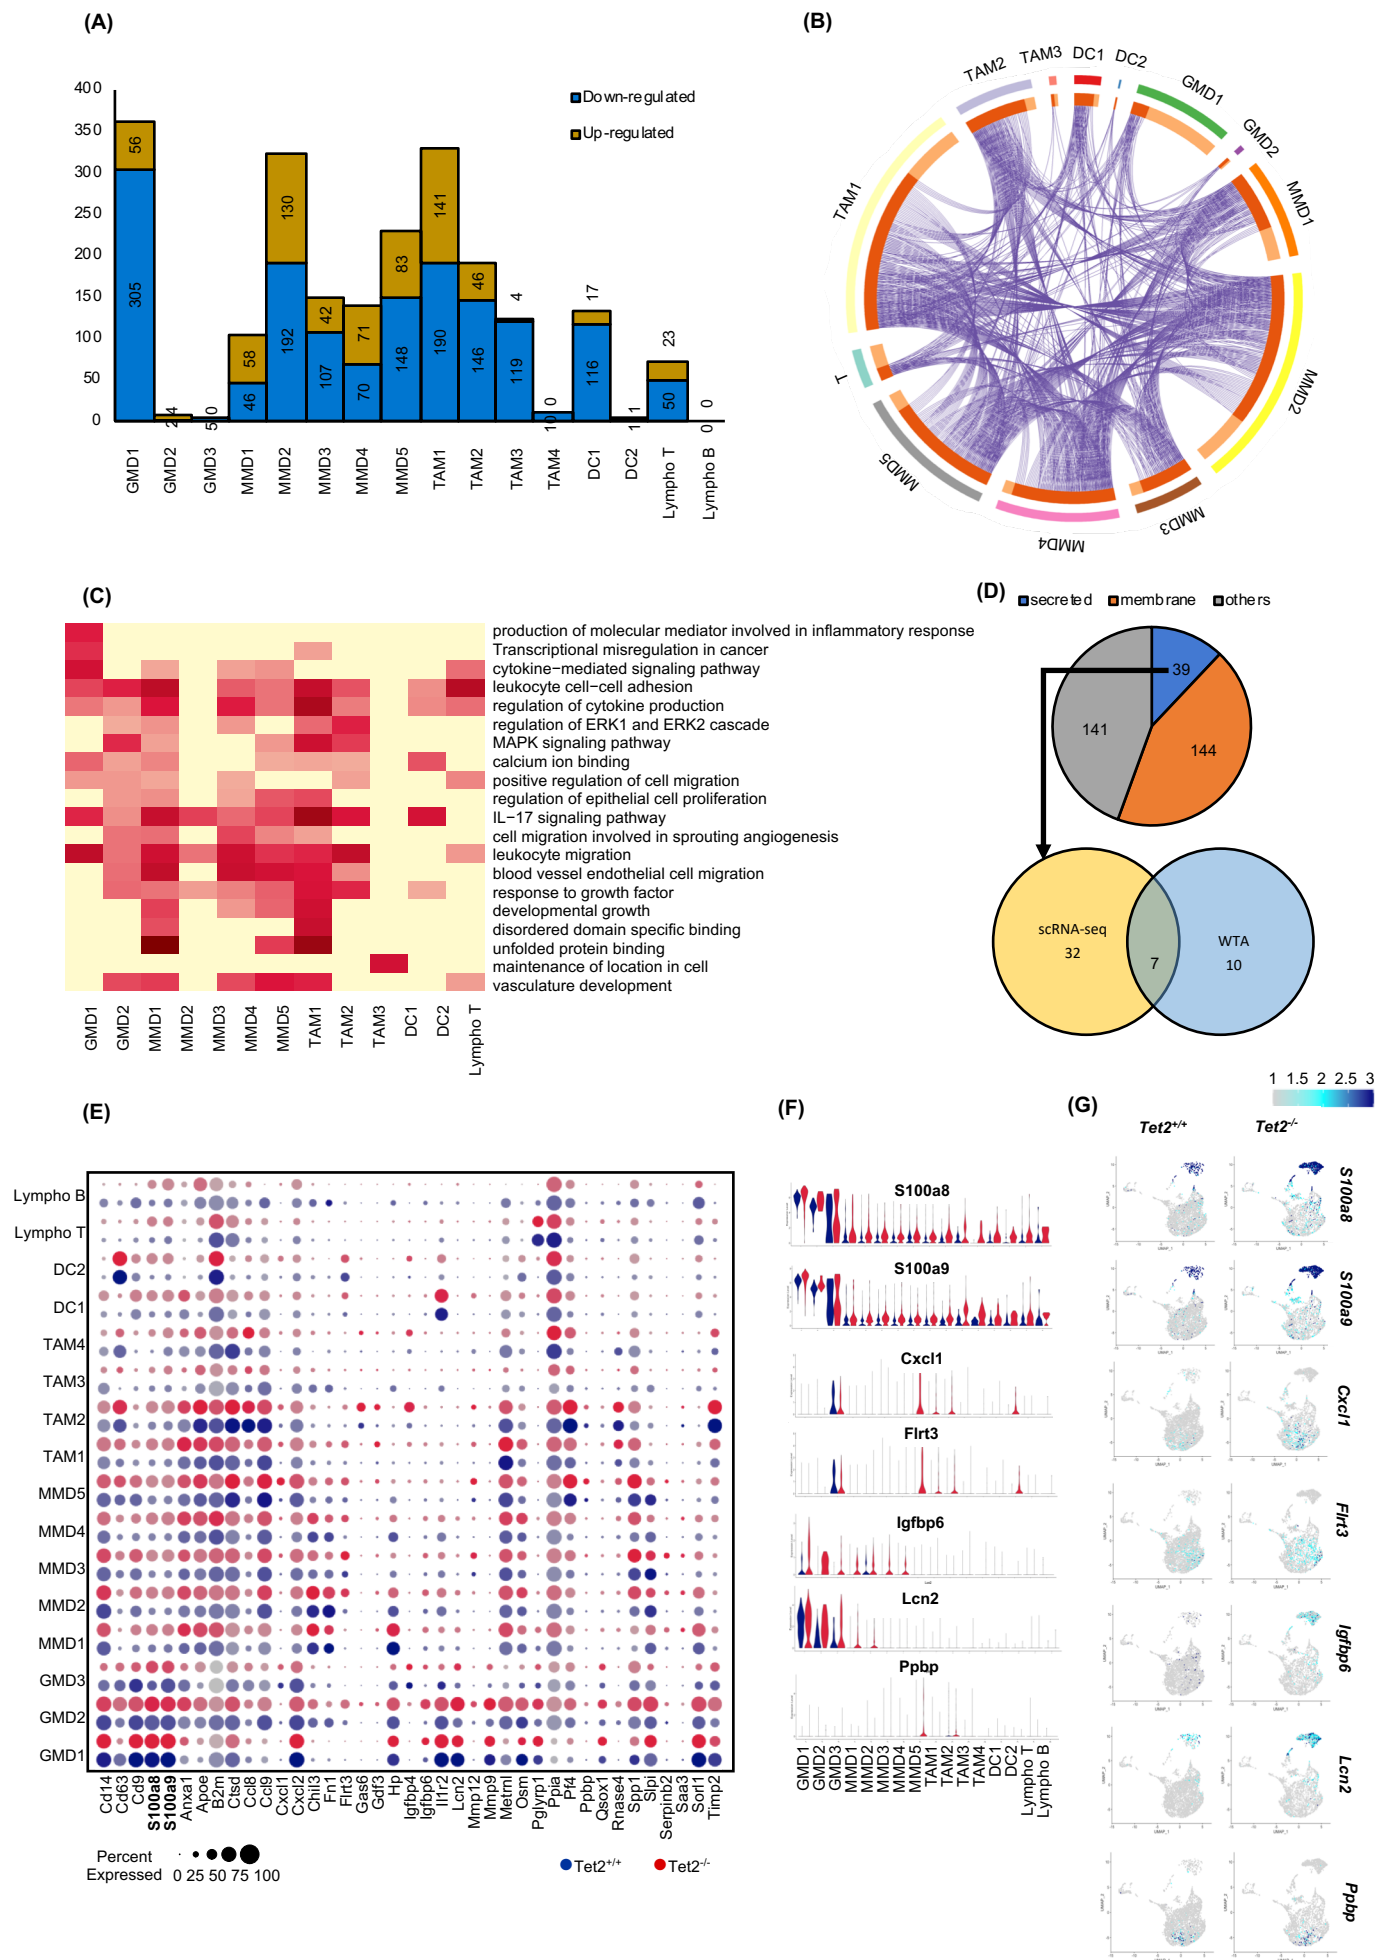

**Figure S4. Single-cell transcriptome analysis revealed comprehensive immune cell profiles and identified candidate mediators in *Tet2*-deficient GMD.**

A, The number of DEGs in the indicated 16 clusters from *Tet2*-deficient immune cells relative to WT. Cut-off, adjusted P value < 0.05.

B, A circos plot from Metascape analysis indicates upregulated genes overlapping among the 13 clusters shown in (A). (GMD3, TAM4 and Lympho B were excluded due to lack of upregulated genes.)

C, Metascape analysis showing the top 20 enrichment pathways of the 13 clusters described in (B). Cut-off, adjusted P value < 0.01.

D, Pie graph (top) including 324 up-regulated markers from the 13 clusters described in (B). David analysis was performed to narrow them to 39 genes that encoded secreted proteins (blue), 144 that encoded membrane proteins (orange), and 141 others (grey). The Venn diagram (bottom) shows the inter-relationship between scRNA-seq and WTA data from GMD, MMD and TAMs for genes encoding secreted proteins, with 7 shared genes, and 32 and 17 specific to either scRNA-seq and WTA, respectively.

E, A dot plot of 39 genes encoding secreted proteins in scRNA-seq. Cut-off, adjusted P value < 0.05. Dot size and color indicate the percentage of cells and expression level in each subcluster, respectively.

F, G, Wrap Plots (F) and Feature Plots (G) of 7 genes from (D) shared by scRNA-seq and WTA.

Figure S5

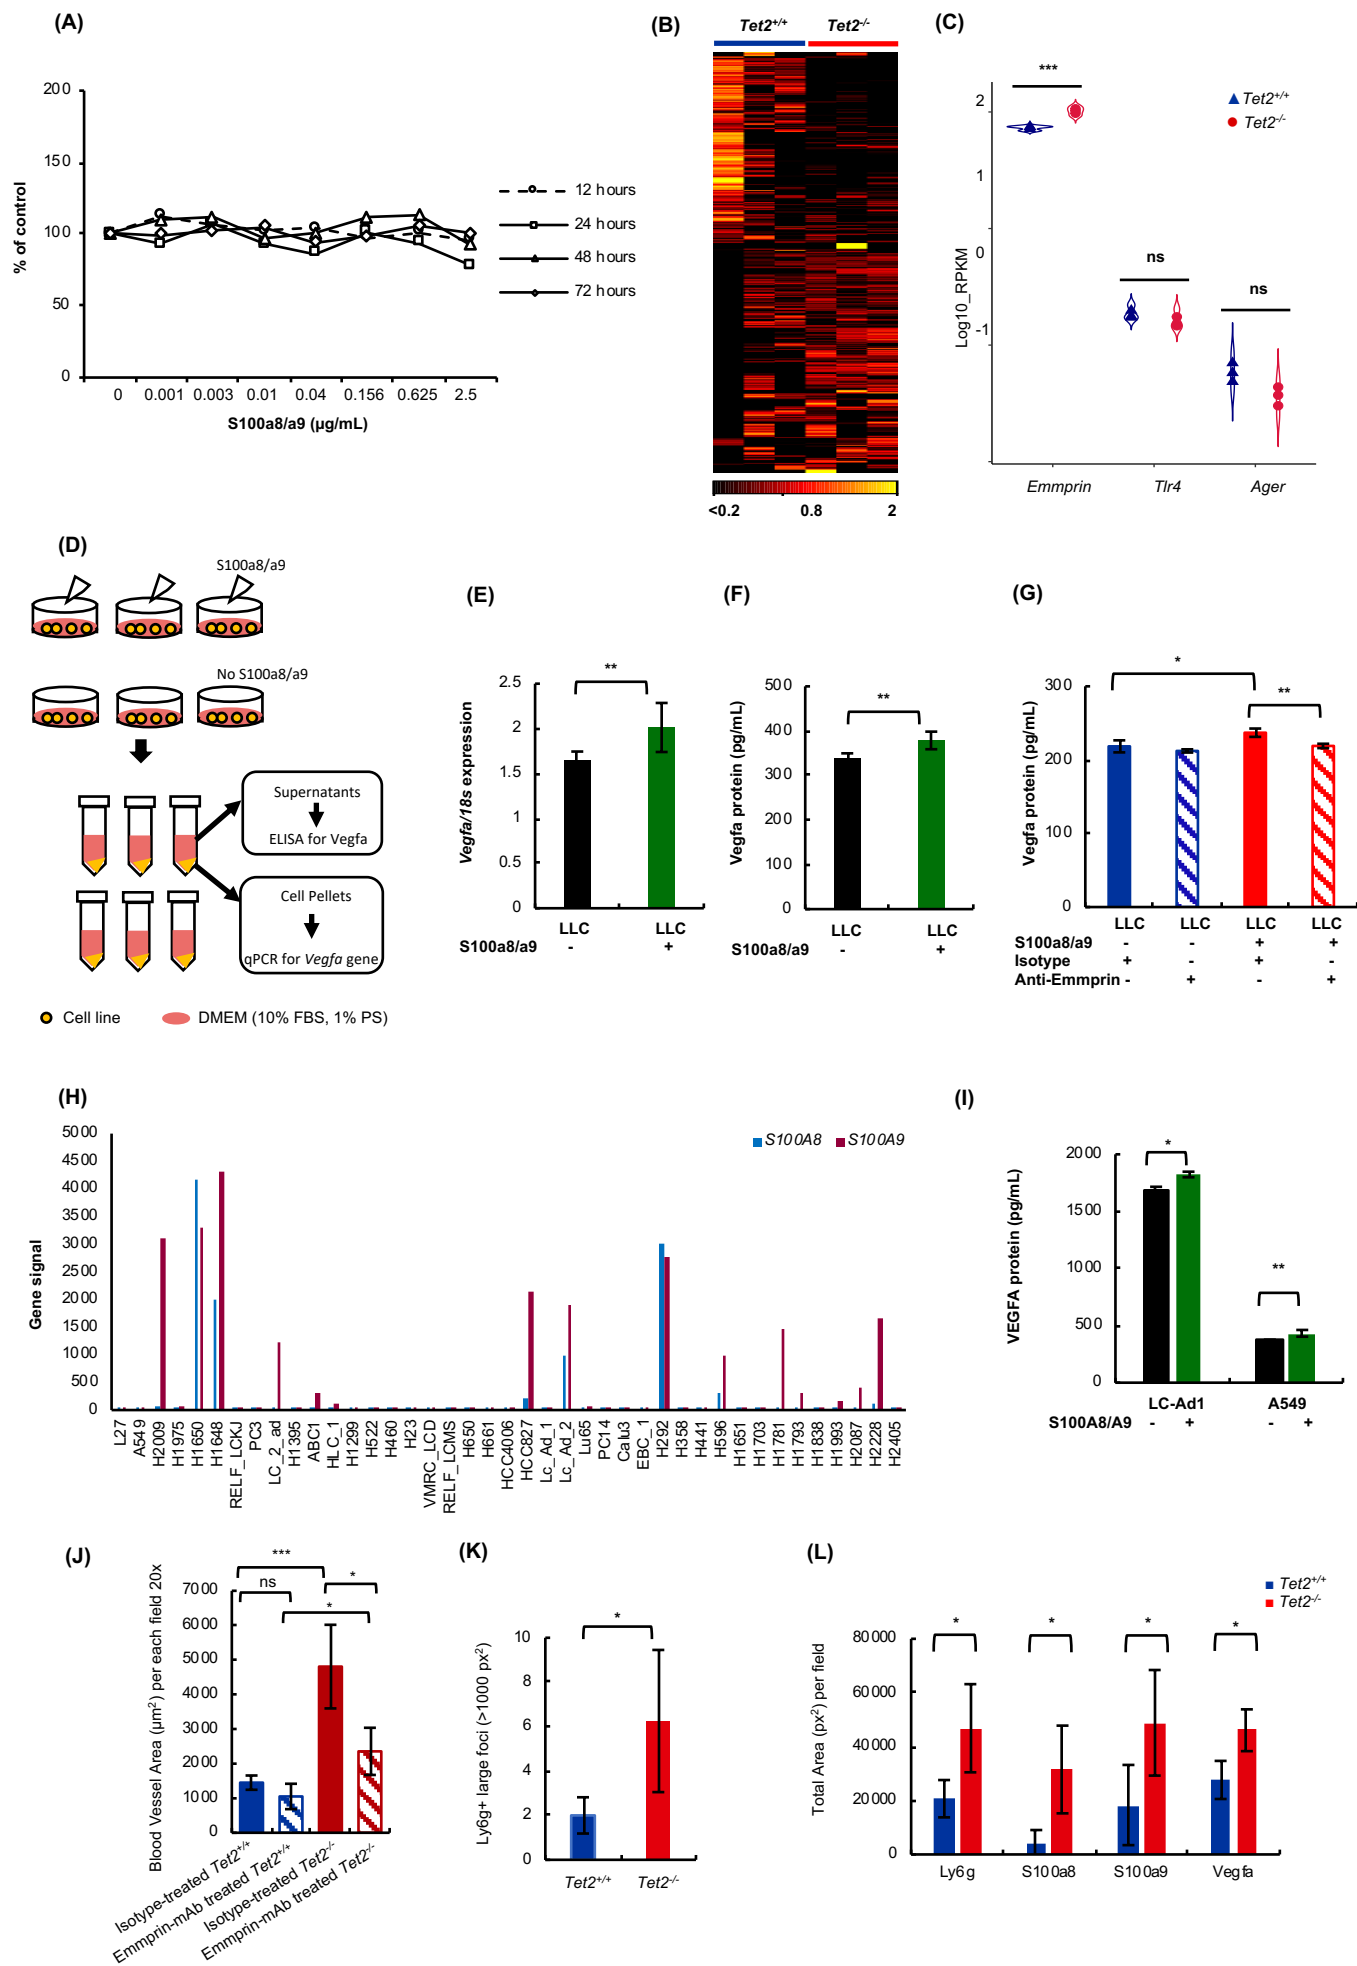

**Figure S5. Vegfa protein secretions are stimulated by S100a/S100a9 in both mouse and human lung cancer cells.**

A, Growth of LLC cells treated in vitro with S100a8/a9 protein. 1000 LLC cells were stimulated at indicated concentrations of S100a8/a9 for 12, 24, 48, or 72 hours.

B, Heatmap of unsupervised clustering of genes differentially expressed in LLC cells sorted from tumors in *Tet2*<sup>-/-</sup> mice versus those from tumors in *Tet2*<sup>+/+</sup> mice. Colors ranging from black, to red to yellow indicates different gene expression from low to high. The color scale below indicates log2 expression values. LLC cells in tumors from *Tet2*<sup>-/-</sup> and *Tet2*<sup>+/+</sup> mice were analyzed as 2 separate groups.

C, Expression of *Bsg*, *Tlr4* and *Ager*, which encode Emmprin, Tlr4 and RAGE, respectively, which reportedly serve as S100a8 and S100a9 receptors. RPKM were calculated from WTA of indicated tumor-derived LLC cells.

D, Experimental schema showing strategy to measure Vegfa protein in supernatants of LLCs treated with S100a8/a9 protein.

E, *Vegfa* expression normalized to *Rn18s* in LLC cells stimulated in vitro with S100a8/a9 protein. For replicates of each group, n = 4.

F, Vegfa protein levels in supernatants of LLC cells described in (E), as detected by ELISA. For replicates of each group, n = 4.

G, Vegfa protein levels in supernatants of LLC cells stimulated in vitro with S100a8/a9 protein under the treatment of anti-Emmprin antibody or isotype, as detected by ELISA. For replicates of each group, n = 3.

H, The signal of *S100A8* and *S100A9* from microarray data of 41 human cell lines.

I, VEGF protein levels in supernatants of LC-Ad-1 or A549 cells treated in vitro with S100a8/a9 protein, as detected by ELISA. For replicates of each group, n = 4.

299 J, Blood vessel area per each field at 20x magnification (5 random fields of view per sample)  
300 in tumor sections from *Tet2*<sup>-/-</sup> and *Tet2*<sup>+/+</sup> mice treated with either anti-Emmprin antibody or  
301 isotype control. Isotype-treated *Tet2*<sup>+/+</sup> (n=3), Isotype-treated *Tet2*<sup>-/-</sup> (n=5), Emmprin-mAb  
302 treated *Tet2*<sup>+/+</sup> (n=3) and Emmprin-mAb treated *Tet2*<sup>-/-</sup> (n=3).  
303 K, The number of Ly6g<sup>+</sup> foci, whose area are larger than 1000 μm<sup>2</sup> per each field at 20x  
304 magnification in tumor sections from *Tet2*<sup>-/-</sup> (n=4) and *Tet2*<sup>+/+</sup> (n=4) mice.  
305 L, Positive area (μm<sup>2</sup>) of Ly6g, S100a8, S100a9 and Vegfa per field at 20x magnification in  
306 tumor sections from *Tet2*<sup>-/-</sup> (n=4) and *Tet2*<sup>+/+</sup> (n=4) mice.  
307  
308

Figure S6

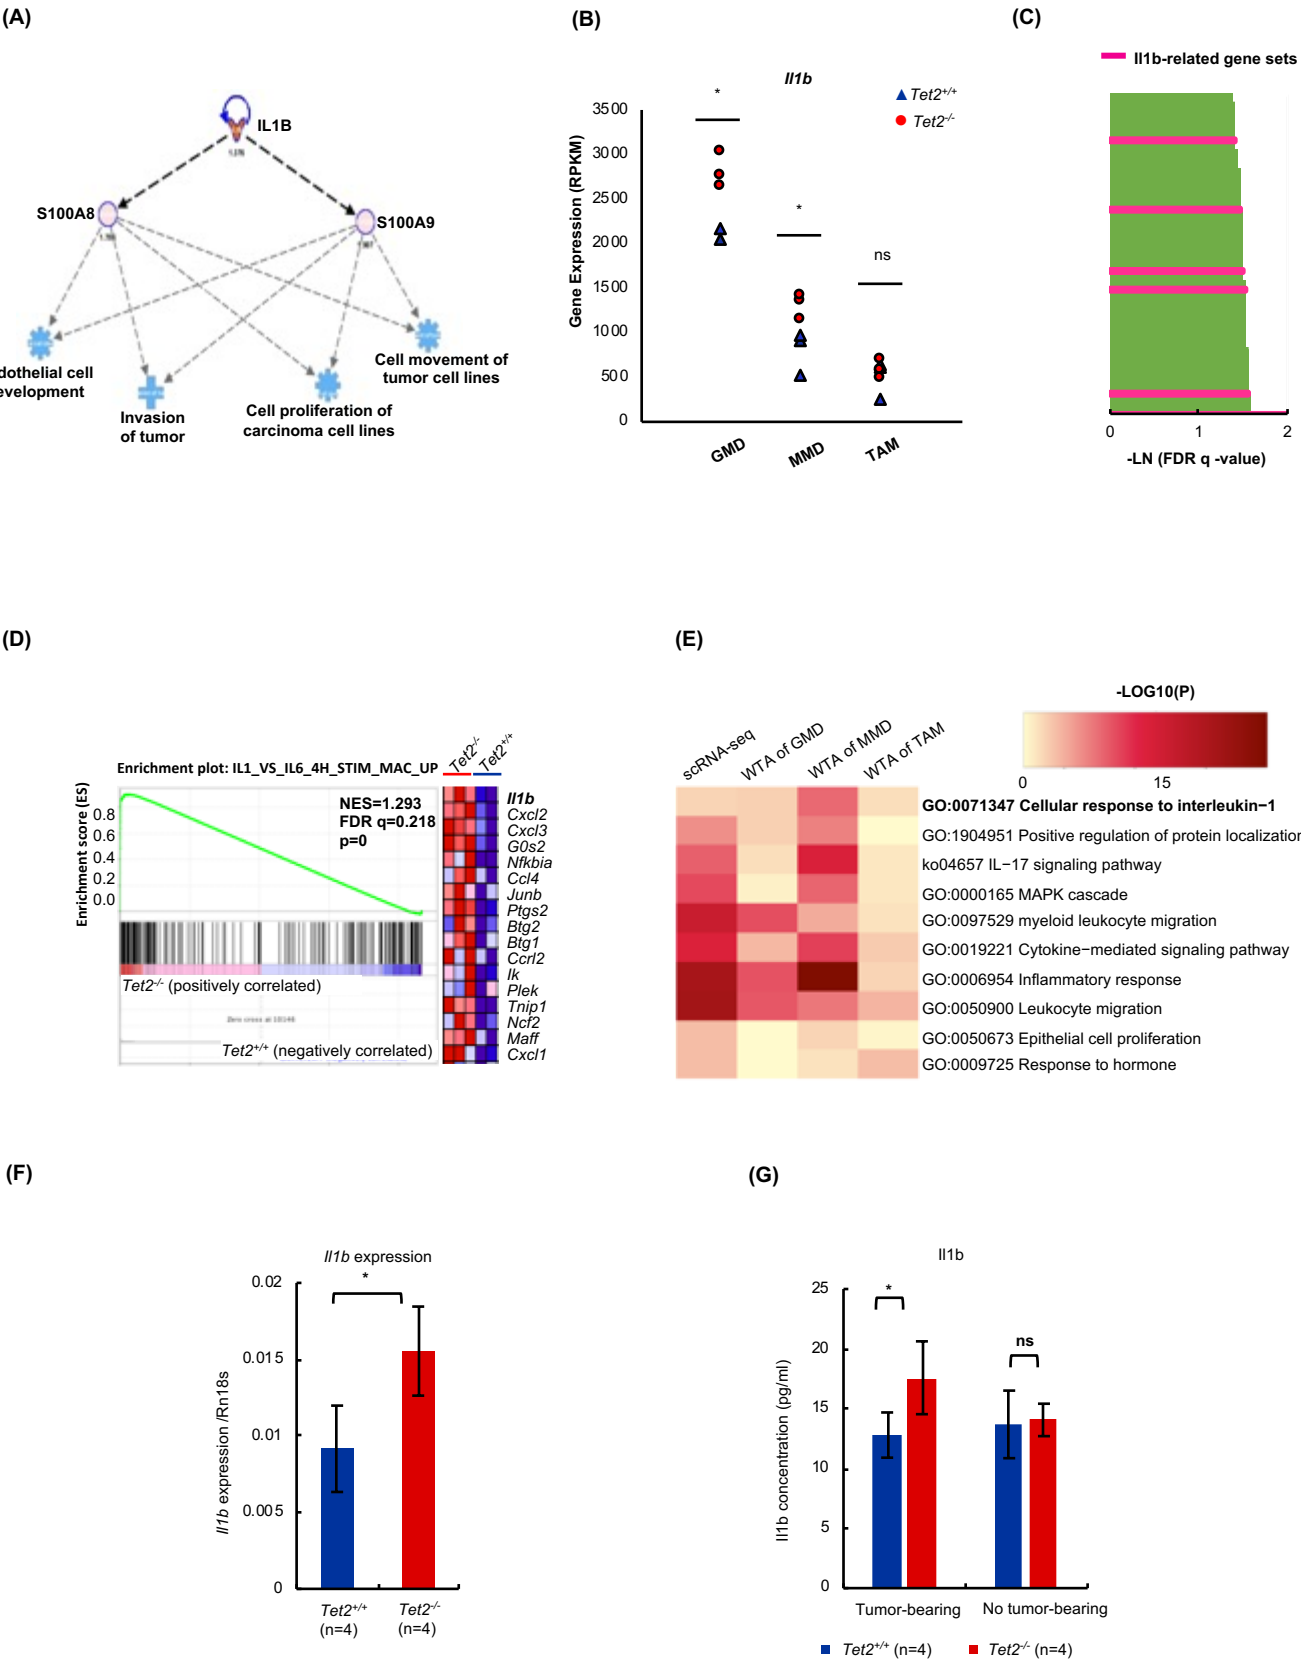

**Figure S6. Pathway analysis revealing Il1b as a candidate regulator of S100a8/S100a9 signaling.**

A, Ingenuity pathway analysis (IPA) of DEGs in GMD (cut-off,  $p < 0.05$ ) to assess signaling upstream and downstream of S100a8 and S100a9. Il1b was identified as a candidate upstream factor. Four predicted downstream pathways are shown in blue.

B, Reads Per Kilobase of transcript, per Million mapped reads (RPKM) values of *Il1b* from WTA data in either *Tet2*-deficient or WT GMD, MMD and TAMs.

C, Gene sets enriched in *Tet2*-deficient relative to WT groups for WTA data from GMD. Pink bars; Il1b-related gene sets (cut-off; FDR  $q < 0.25$ , nominal  $p < 0.05$ ).

D, Enrichment plot and heatmap of one enriched pathway related to *Il1b*, namely, the IL1\_VS\_IL6\_4H\_STIM\_MAC\_UP pathway, using WTA data from GMD.

E, Metascape analysis revealing the top 10 enrichment pathways as determined from upregulated gene sets of scRNA-seq data and WTA of GMD, MMD, and TAMs.

F, *Il1b* mRNA expression normalized to *Rn18s* in GMD sorted from tumors from *Tet2*<sup>-/-</sup> ( $n = 3$ ) and *Tet2*<sup>+/+</sup> ( $n = 4$ ) mice.

G, Il1b protein levels in plasma of either tumor-bearing or non-tumor-bearing mice, based on ELISA. Each group,  $n = 4$ .

Figure S7

(A)

Lung adenocarcinoma

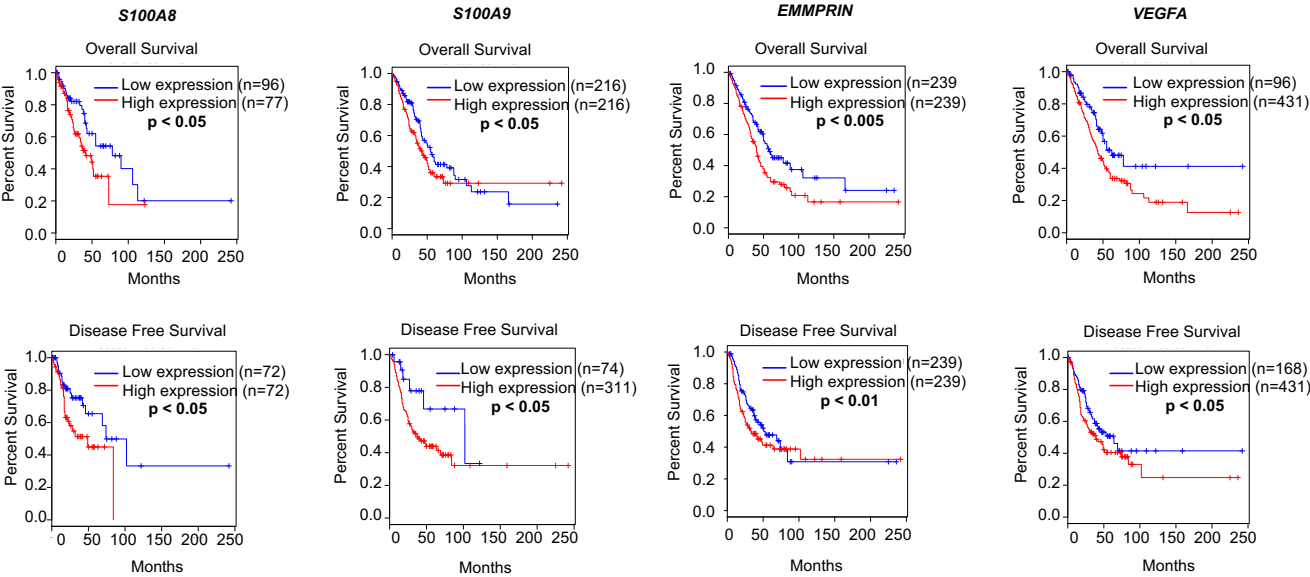

(B)

Lung squamous cell carcinoma

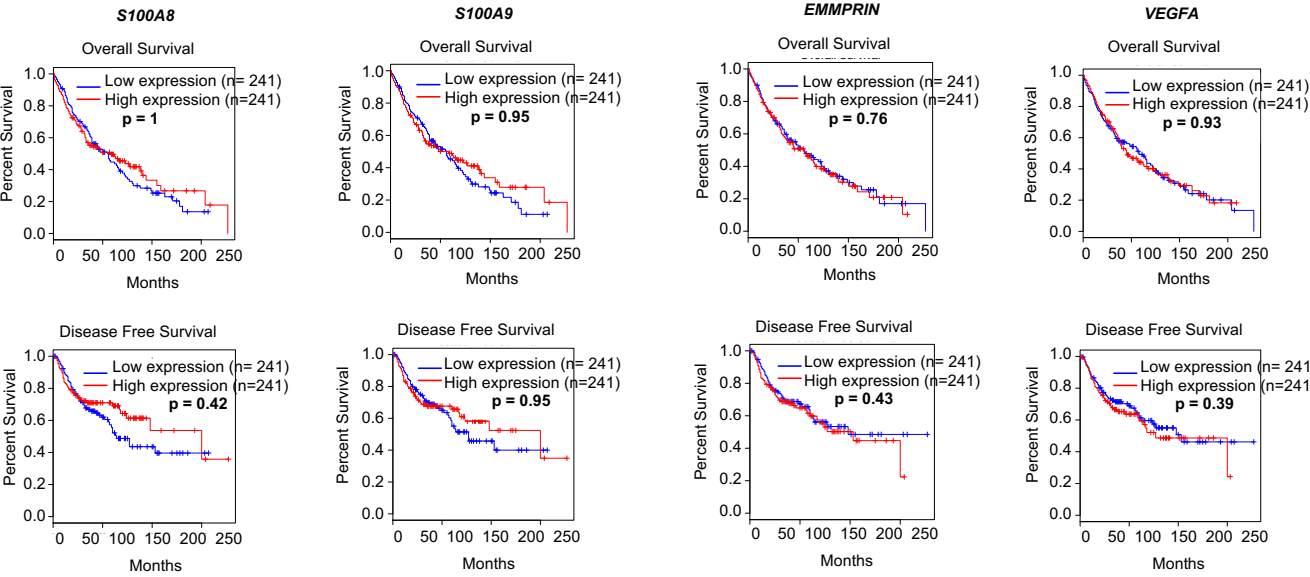

328 **Figure S7. The clinical impact of *S100A8*, *S100A9*, *EMMPRIN*, or *VEGFA* expressions in**  
329 **lung cancer patients.**

330 A, Overall survival (OS) and disease-free survival (DFS) of patients with lung adenocarcinoma  
331 whose tumors show indicated *S100A8*, *S100A9*, *EMMPRIN*, or *VEGFA* expression. A log-rank  
332 test was applied for statistical analysis.

333 B, OS and DFS comparable to that described in (A) but performed with patients with lung  
334 squamous cell carcinoma. A log-rank test was applied for statistical analysis.

335

336

## 337 SUPPLEMENTARY TABLES

338 Table S1. The top 5 markers highly expressed in clusters of CD45 cells.

| No. | Cluster | gene           | p_val     | avg_logFC | pct.1 | pct.2 | p_val_adj |
|-----|---------|----------------|-----------|-----------|-------|-------|-----------|
| 1   | GMD1    | <i>Sl100a9</i> | 0         | 3.6619474 | 1     | 0.61  | 0         |
| 2   | GMD1    | <i>Sl100a8</i> | 0         | 3.6008872 | 0.988 | 0.559 | 0         |
| 3   | GMD1    | <i>Gm5483</i>  | 0         | 3.1815544 | 0.906 | 0.213 | 0         |
| 4   | GMD1    | <i>Retnlg</i>  | 7.50E-279 | 3.0239987 | 0.873 | 0.177 | 1.50E-275 |
| 5   | GMD1    | <i>Stfa2l1</i> | 4.36E-117 | 2.809631  | 0.728 | 0.194 | 8.72E-114 |
| 6   | GMD2    | <i>Sl100a9</i> | 1.68E-41  | 1.1820433 | 1     | 0.649 | 3.36E-38  |
| 7   | GMD2    | <i>Sl100a8</i> | 2.66E-41  | 1.132321  | 1     | 0.601 | 5.31E-38  |
| 8   | GMD2    | <i>Hdc</i>     | 2.69E-39  | 0.8292277 | 0.989 | 0.476 | 5.39E-36  |
| 9   | GMD2    | <i>G0s2</i>    | 1.79E-33  | 0.9718507 | 0.819 | 0.3   | 3.57E-30  |
| 10  | GMD2    | <i>Cxcr2</i>   | 2.19E-33  | 0.8683871 | 0.851 | 0.326 | 4.38E-30  |
| 51  | GMD3    | <i>Cald1</i>   | 9.55E-86  | 2.7566731 | 0.969 | 0.259 | 1.91E-82  |
| 52  | GMD3    | <i>Gm26917</i> | 2.27E-66  | 2.9794049 | 0.962 | 0.751 | 4.54E-63  |
| 53  | GMD3    | <i>Dst</i>     | 8.99E-64  | 2.4593517 | 0.931 | 0.555 | 1.80E-60  |
| 54  | GMD3    | <i>Hmga2</i>   | 3.62E-54  | 2.2739668 | 0.838 | 0.183 | 7.24E-51  |
| 55  | GMD3    | <i>Gm26870</i> | 1.84E-10  | 2.6159146 | 0.654 | 0.334 | 3.69E-07  |
| 11  | MMD1    | <i>Gngt2</i>   | 2.33E-158 | 1.4121712 | 0.968 | 0.72  | 4.66E-155 |
| 12  | MMD1    | <i>Adgre5</i>  | 1.28E-122 | 1.0891883 | 0.839 | 0.383 | 2.55E-119 |
| 13  | MMD1    | <i>Hp</i>      | 7.89E-114 | 1.3351314 | 0.911 | 0.603 | 1.58E-110 |
| 14  | MMD1    | <i>Chil3</i>   | 2.13E-56  | 1.2319696 | 0.797 | 0.553 | 4.27E-53  |
| 15  | MMD1    | <i>Fn1</i>     | 1.52E-43  | 1.1886725 | 0.752 | 0.597 | 3.03E-40  |
| 16  | MMD2    | <i>Vcan</i>    | 8.74E-279 | 1.2098835 | 0.995 | 0.829 | 1.75E-275 |

|    |      |                 |           |           |       |       |           |
|----|------|-----------------|-----------|-----------|-------|-------|-----------|
| 17 | MMD2 | <i>Itgal</i>    | 3.71E-190 | 0.8937151 | 0.899 | 0.664 | 7.42E-187 |
| 18 | MMD2 | <i>Fnl</i>      | 4.64E-173 | 0.9650175 | 0.879 | 0.571 | 9.28E-170 |
| 19 | MMD2 | <i>Chil3</i>    | 5.73E-172 | 1.4652862 | 0.848 | 0.53  | 1.15E-168 |
| 20 | MMD2 | <i>Dmkn</i>     | 6.72E-159 | 1.0441625 | 0.824 | 0.549 | 1.34E-155 |
| 21 | MMD3 | <i>Ndrgl</i>    | 3.58E-175 | 1.1753423 | 0.946 | 0.795 | 7.15E-172 |
| 22 | MMD3 | <i>Hspa1a</i>   | 1.08E-138 | 1.7998893 | 0.859 | 0.625 | 2.16E-135 |
| 23 | MMD3 | <i>Hsp90aal</i> | 3.42E-119 | 1.263954  | 0.991 | 0.972 | 6.85E-116 |
| 24 | MMD3 | <i>Mtl</i>      | 2.32E-115 | 1.272976  | 0.949 | 0.845 | 4.64E-112 |
| 25 | MMD3 | <i>Hspa1b</i>   | 1.71E-112 | 1.7265782 | 0.781 | 0.516 | 3.43E-109 |
| 26 | MMD4 | <i>Mx1</i>      | 2.46E-271 | 1.5392613 | 0.949 | 0.637 | 4.92E-268 |
| 27 | MMD4 | <i>Ifit3</i>    | 3.84E-270 | 1.6833242 | 0.962 | 0.625 | 7.68E-267 |
| 28 | MMD4 | <i>Ifit2</i>    | 1.06E-248 | 1.6938069 | 0.924 | 0.607 | 2.12E-245 |
| 29 | MMD4 | <i>Rsad2</i>    | 4.58E-217 | 1.6653647 | 0.971 | 0.763 | 9.15E-214 |
| 30 | MMD4 | <i>Cxcl10</i>   | 9.14E-145 | 1.6644475 | 0.873 | 0.692 | 1.83E-141 |
| 31 | MMD5 | <i>Hmox1</i>    | 8.66E-222 | 1.2093445 | 0.989 | 0.901 | 1.73E-218 |
| 32 | MMD5 | <i>Prdx1</i>    | 1.88E-195 | 1.2748755 | 0.994 | 0.975 | 3.76E-192 |
| 33 | MMD5 | <i>Pf4</i>      | 7.99E-195 | 1.5547752 | 0.889 | 0.627 | 1.60E-191 |
| 34 | MMD5 | <i>Arg1</i>     | 1.72E-177 | 1.605917  | 0.806 | 0.569 | 3.44E-174 |
| 35 | MMD5 | <i>Ppbp</i>     | 1.37E-27  | 1.3871295 | 0.37  | 0.29  | 2.75E-24  |
| 36 | TAM1 | <i>Clqa</i>     | 4.44E-163 | 1.1936733 | 0.853 | 0.547 | 8.88E-160 |
| 37 | TAM1 | <i>Clqc</i>     | 1.24E-157 | 1.0529179 | 0.856 | 0.579 | 2.48E-154 |
| 38 | TAM1 | <i>Clqb</i>     | 4.16E-153 | 1.147579  | 0.888 | 0.708 | 8.32E-150 |
| 39 | TAM1 | <i>Ccl7</i>     | 2.38E-120 | 0.9833242 | 0.864 | 0.581 | 4.75E-117 |
| 40 | TAM1 | <i>Cxcl9</i>    | 3.70E-71  | 1.2126565 | 0.712 | 0.568 | 7.40E-68  |

|    |      |                  |           |           |       |       |            |
|----|------|------------------|-----------|-----------|-------|-------|------------|
| 41 | TAM2 | <i>Clqc</i>      | 1.88E-211 | 1.7674086 | 0.972 | 0.587 | 3.76E-208  |
| 42 | TAM2 | <i>Clqa</i>      | 2.69E-203 | 1.8822504 | 0.954 | 0.558 | 5.38E-200  |
| 43 | TAM2 | <i>Cbr2</i>      | 5.43E-201 | 1.5082011 | 0.871 | 0.241 | 1.09E-197  |
| 44 | TAM2 | <i>Clqb</i>      | 1.35E-195 | 1.6715207 | 0.978 | 0.712 | 2.70E-192  |
| 45 | TAM2 | <i>Ccl8</i>      | 5.33E-171 | 2.4783197 | 0.926 | 0.5   | 1.07E-167  |
| 46 | TAM3 | <i>Gm42418</i>   | 3.76E-108 | 1.9809251 | 1     | 1     | 7.52E-105  |
| 47 | TAM3 | <i>AY036118</i>  | 3.07E-63  | 1.4226547 | 0.918 | 0.946 | 6.14E-60   |
| 48 | TAM3 | <i>Acp5</i>      | 9.93E-10  | 1.0909412 | 0.326 | 0.242 | 1.99E-06   |
| 49 | TAM3 | <i>Hbb-bt</i>    | 3.50E-08  | 1.8543822 | 0.345 | 0.057 | 7.00E-05   |
| 50 | TAM3 | <i>Gm26917</i>   | 5.74E-06  | 1.5556694 | 0.715 | 0.757 | 0.01147014 |
| 56 | TAM4 | <i>Cpa3</i>      | 3.71E-34  | 2.4811262 | 0.407 | 0.051 | 7.41E-31   |
| 57 | TAM4 | <i>Top2a</i>     | 4.41E-24  | 2.12114   | 0.847 | 0.306 | 8.81E-21   |
| 58 | TAM4 | <i>Hist1h2ae</i> | 7.80E-15  | 2.2044307 | 0.78  | 0.415 | 1.56E-11   |
| 59 | TAM4 | <i>Tpsb2</i>     | 5.62E-14  | 2.1689507 | 0.322 | 0.072 | 1.12E-10   |
| 60 | TAM4 | <i>Mcpt4</i>     | 0.0002674 | 2.8145358 | 0.339 | 0.086 | 0.53485904 |
| 61 | DC1  | <i>H2-Eb1</i>    | 1.83E-134 | 2.838175  | 1     | 0.574 | 3.66E-131  |
| 62 | DC1  | <i>H2-Aa</i>     | 2.17E-132 | 2.6786995 | 1     | 0.643 | 4.34E-129  |
| 63 | DC1  | <i>H2-Ab1</i>    | 5.38E-130 | 2.6663118 | 1     | 0.75  | 1.08E-126  |
| 64 | DC1  | <i>Cd74</i>      | 1.08E-127 | 2.1679369 | 1     | 0.828 | 2.15E-124  |
| 65 | DC1  | <i>Ifitm1</i>    | 3.93E-84  | 1.9601846 | 0.972 | 0.821 | 7.87E-81   |
| 66 | DC2  | <i>Ccr7</i>      | 3.35E-57  | 3.63565   | 1     | 0.273 | 6.70E-54   |
| 67 | DC2  | <i>Fscn1</i>     | 3.99E-56  | 3.0575661 | 0.952 | 0.155 | 7.99E-53   |
| 68 | DC2  | <i>Serpinb6b</i> | 9.14E-55  | 3.1305203 | 0.984 | 0.275 | 1.83E-51   |
| 69 | DC2  | <i>Tbc1d4</i>    | 1.88E-52  | 3.4405529 | 1     | 0.275 | 3.77E-49   |

|    |     |              |           |           |       |       |           |
|----|-----|--------------|-----------|-----------|-------|-------|-----------|
| 70 | DC2 | <i>Ccl5</i>  | 2.97E-41  | 3.3221448 | 0.984 | 0.446 | 5.93E-38  |
| 71 | T   | <i>Cd3g</i>  | 1.11E-278 | 2.8989607 | 0.987 | 0.138 | 2.22E-275 |
| 72 | T   | <i>Trbc2</i> | 4.62E-268 | 3.1458226 | 0.987 | 0.227 | 9.24E-265 |
| 73 | T   | <i>Nkg7</i>  | 6.83E-216 | 3.2795426 | 0.97  | 0.326 | 1.37E-212 |
| 74 | T   | <i>Gzmb</i>  | 1.48E-184 | 3.0430756 | 0.911 | 0.302 | 2.96E-181 |
| 75 | T   | <i>Ccl5</i>  | 2.01E-136 | 2.8544928 | 0.897 | 0.43  | 4.01E-133 |
| 76 | B   | <i>Cd79a</i> | 1.31E-81  | 2.7842508 | 0.909 | 0.035 | 2.63E-78  |
| 77 | B   | <i>Iglc3</i> | 6.37E-50  | 2.5966944 | 0.909 | 0.086 | 1.27E-46  |
| 78 | B   | <i>Ebfl</i>  | 3.63E-47  | 2.8263811 | 0.955 | 0.095 | 7.26E-44  |
| 79 | B   | <i>Igkc</i>  | 4.59E-35  | 4.5551395 | 1     | 0.133 | 9.19E-32  |
| 80 | B   | <i>Ighm</i>  | 3.67E-17  | 2.7625069 | 1     | 0.489 | 7.34E-14  |

339

340 **Table S2. The top 20 enrichment pathways in each cluster of Cd45+cells based on scRNA-**  
341 **seq.**

| CLUSTER | GO            | Description                                       | LogP | Enrichment | Z-score |
|---------|---------------|---------------------------------------------------|------|------------|---------|
| GMD1    | R-MMU-6799990 | Metal sequestration by antimicrobial proteins     | -4.3 | 32         | 9.6     |
| GMD1    | GO:0050786    | RAGE receptor binding                             | -6.1 | 24         | 11      |
| GMD1    | GO:0005031    | tumor necrosis factor-activated receptor activity | -5   | 24         | 9.6     |
| GMD1    | GO:1904683    | regulation of metalloendopeptidase activity       | -3.6 | 21         | 7.7     |

|      |               |                                                                      |      |          |     |
|------|---------------|----------------------------------------------------------------------|------|----------|-----|
| GMD1 | GO:0002374    | cytokine secretion involved in immune response                       | -3.6 | 21       | 7.7 |
| GMD1 | GO:0070339    | response to bacterial lipopeptide                                    | -3.6 | 21       | 7.7 |
| GMD1 | GO:0035662    | Toll-like receptor 4 binding                                         | -3.6 | 21       | 7.7 |
| GMD1 | GO:1905049    | negative regulation of metallopeptidase activity                     | -3.6 | 21       | 7.7 |
| GMD1 | GO:0071221    | cellular response to bacterial lipopeptide                           | -3.6 | 21       | 7.7 |
| GMD1 | GO:0071220    | cellular response to bacterial lipoprotein                           | -3.6 | 21       | 7.7 |
| GMD1 | GO:0070163    | regulation of adiponectin secretion                                  | -3.6 | 21       | 7.7 |
| GMD1 | GO:2000321    | positive regulation of T-helper 17 cell differentiation              | -3.6 | 21       | 7.7 |
| GMD1 | GO:0070162    | adiponectin secretion                                                | -3.6 | 21       | 7.7 |
| GMD1 | GO:0005035    | death receptor activity                                              | -4.5 | 19       | 8.3 |
| GMD1 | GO:2000562    | negative regulation of CD4-positive, alpha-beta T cell proliferation | -4.5 | 19       | 8.3 |
| GMD1 | GO:0004908    | interleukin-1 receptor activity                                      | -3.4 | 18       | 7.1 |
| GMD1 | GO:0060613    | fat pad development                                                  | -3.4 | 18       | 7.1 |
| GMD1 | GO:0008443    | phosphofructokinase activity                                         | -3.4 | 18       | 7.1 |
| GMD1 | GO:0033029    | regulation of neutrophil apoptotic process                           | -4.3 | 17       | 7.9 |
| GMD1 | GO:0032493    | response to bacterial lipoprotein                                    | -3.2 | 16       | 6.6 |
| GMD2 | R-MMU-6799990 | Metal sequestration by antimicrobial proteins                        | -6.8 | 2.10E+02 | 25  |
| GMD2 | GO:0035325    | Toll-like receptor binding                                           | -4.7 | 57       | 13  |

|      |               |                                                       |      |    |     |
|------|---------------|-------------------------------------------------------|------|----|-----|
| GMD2 | R-MMU-5686938 | Regulation of TLR by endogenous ligand                | -4.6 | 50 | 12  |
| GMD2 | GO:0002523    | leukocyte migration involved in inflammatory response | -4.1 | 36 | 10  |
| GMD2 | R-MMU-8956319 | Nucleobase catabolism                                 | -3.6 | 25 | 8.4 |
| GMD2 | GO:0030593    | neutrophil chemotaxis                                 | -5.9 | 17 | 9.6 |
| GMD2 | GO:0071621    | granulocyte chemotaxis                                | -6.5 | 16 | 9.9 |
| GMD2 | ko04657       | IL-17 signaling pathway                               | -4.8 | 16 | 8.3 |
| GMD2 | mmu04657      | IL-17 signaling pathway                               | -4.8 | 16 | 8.3 |
| GMD2 | R-MMU-6803157 | Antimicrobial peptides                                | -4.7 | 15 | 8.2 |
| GMD2 | ko04640       | Hematopoietic cell lineage                            | -4.7 | 15 | 8.1 |
| GMD2 | GO:0034109    | homotypic cell-cell adhesion                          | -3.8 | 15 | 7.3 |
| GMD2 | GO:0071675    | regulation of mononuclear cell migration              | -3   | 15 | 6.4 |
| GMD2 | GO:0071622    | regulation of granulocyte chemotaxis                  | -3   | 15 | 6.3 |
| GMD2 | GO:1990266    | neutrophil migration                                  | -5.3 | 14 | 8.5 |
| GMD2 | mmu04640      | Hematopoietic cell lineage                            | -4.6 | 14 | 7.8 |
| GMD2 | GO:1903036    | positive regulation of response to wounding           | -3.7 | 14 | 6.9 |
| GMD2 | GO:0016209    | antioxidant activity                                  | -3.7 | 14 | 6.9 |
| GMD2 | GO:0061912    | selective autophagy                                   | -2.9 | 14 | 6   |
| GMD2 | GO:0002833    | positive regulation of response to biotic stimulus    | -2.9 | 14 | 6   |

|      |               |                                                          |      |    |     |
|------|---------------|----------------------------------------------------------|------|----|-----|
| GMD3 | GO:0005588    | collagen type V trimer                                   | -4.1 | 27 | 8.7 |
| GMD3 | R-MMU-6799990 | Metal sequestration by antimicrobial proteins            | -4.1 | 27 | 8.7 |
| GMD3 | GO:0007525    | somatic muscle development                               | -4.1 | 27 | 8.7 |
| GMD3 | GO:0035061    | interchromatin granule                                   | -4.1 | 27 | 8.7 |
| GMD3 | GO:0051256    | mitotic spindle midzone assembly                         | -5   | 24 | 9.4 |
| GMD3 | CORUM:3029    | Drosha complex                                           | -6   | 22 | 10  |
| GMD3 | GO:0070934    | CRD-mediated mRNA stabilization                          | -3.7 | 21 | 7.7 |
| GMD3 | GO:0000395    | mRNA 5'-splice site recognition                          | -3.7 | 21 | 7.7 |
| GMD3 | GO:0097198    | histone H3-K36 trimethylation                            | -3.7 | 21 | 7.7 |
| GMD3 | GO:0051255    | spindle midzone assembly                                 | -5.7 | 20 | 9.6 |
| GMD3 | GO:0000022    | mitotic spindle elongation                               | -4.7 | 20 | 8.7 |
| GMD3 | GO:0042382    | paraspeckles                                             | -4.7 | 20 | 8.7 |
| GMD3 | GO:0051231    | spindle elongation                                       | -4.4 | 18 | 8.1 |
| GMD3 | GO:0021825    | substrate-dependent cerebral cortex tangential migration | -3.4 | 18 | 7   |
| GMD3 | GO:0000912    | assembly of actomyosin apparatus involved in cytokinesis | -3.4 | 18 | 7   |
| GMD3 | GO:0050733    | RS domain binding                                        | -3.4 | 18 | 7   |
| GMD3 | GO:0000915    | actomyosin contractile ring assembly                     | -3.4 | 18 | 7   |
| GMD3 | GO:0098961    | dendritic transport of ribonucleoprotein complex         | -3.4 | 18 | 7   |
| GMD3 | GO:0070937    | CRD-mediated mRNA stability complex                      | -3.4 | 18 | 7   |

|      |                   |                                                                              |      |    |     |
|------|-------------------|------------------------------------------------------------------------------|------|----|-----|
| GMD3 | GO:0098963        | dendritic transport of messenger<br>ribonucleoprotein complex                | -3.4 | 18 | 7   |
| MMD1 | GO:0071593        | lymphocyte aggregation                                                       | -4.1 | 31 | 9.4 |
| MMD1 | GO:0004563        | beta-N-acetylhexosaminidase activity                                         | -4.1 | 31 | 9.4 |
| MMD1 | GO:0071499        | cellular response to laminar fluid shear<br>stress                           | -4.1 | 31 | 9.4 |
| MMD1 | GO:0001740        | Barr body                                                                    | -4.1 | 31 | 9.4 |
| MMD1 | GO:0140031        | phosphorylation-dependent protein<br>binding                                 | -4.1 | 31 | 9.4 |
| MMD1 | GO:0034616        | response to laminar fluid shear stress                                       | -3.8 | 26 | 8.6 |
| MMD1 | GO:0050861        | positive regulation of B cell receptor<br>signaling pathway                  | -3.8 | 26 | 8.6 |
| MMD1 | GO:0060369        | positive regulation of Fc receptor mediated<br>stimulatory signaling pathway | -3.8 | 26 | 8.6 |
| MMD1 | GO:0010727        | negative regulation of hydrogen peroxide<br>metabolic process                | -3.8 | 26 | 8.6 |
| MMD1 | mmu_M00146        | NADH dehydrogenase (ubiquinone) 1<br>alpha subcomplex                        | -6.9 | 23 | 11  |
| MMD1 | M00146            | NADH dehydrogenase (ubiquinone) 1<br>alpha subcomplex                        | -6.9 | 23 | 11  |
| MMD1 | R-MMU-<br>5621480 | Dectin-2 family                                                              | -3.6 | 23 | 8   |
| MMD1 | GO:0032667        | regulation of interleukin-23 production                                      | -3.6 | 23 | 8   |
| MMD1 | GO:0006685        | sphingomyelin catabolic process                                              | -3.6 | 23 | 8   |

|      |               |                                                                   |      |    |     |
|------|---------------|-------------------------------------------------------------------|------|----|-----|
| MMD1 | GO:0071541    | eukaryotic translation initiation factor 3 complex, eIF3m         | -3.6 | 23 | 8   |
| MMD1 | R-MMU-1236973 | Cross-presentation of particulate exogenous antigens (phagosomes) | -3.6 | 23 | 8   |
| MMD1 | GO:0032627    | interleukin-23 production                                         | -3.6 | 23 | 8   |
| MMD1 | GO:0016479    | negative regulation of transcription by RNA polymerase I          | -3.6 | 23 | 8   |
| MMD1 | GO:0038096    | Fc-gamma receptor signaling pathway involved in phagocytosis      | -3.5 | 20 | 7.5 |
| MMD1 | GO:0010728    | regulation of hydrogen peroxide biosynthetic process              | -3.5 | 20 | 7.5 |
| MMD2 | mmu_M00095    | C5 isoprenoid biosynthesis, mevalonate pathway                    | -6.1 | 50 | 14  |
| MMD2 | M00095        | C5 isoprenoid biosynthesis, mevalonate pathway                    | -6.1 | 50 | 14  |
| MMD2 | GO:1900222    | negative regulation of amyloid-beta clearance                     | -4.5 | 45 | 11  |
| MMD2 | R-MMU-191273  | Cholesterol biosynthesis                                          | -11  | 42 | 18  |
| MMD2 | GO:0008250    | oligosaccharyltransferase complex                                 | -5.7 | 42 | 13  |
| MMD2 | GO:0034663    | endoplasmic reticulum chaperone complex                           | -4.1 | 34 | 9.8 |
| MMD2 | CORUM:538     | Cytochrome c oxidase, mitochondrial                               | -4.1 | 34 | 9.8 |
| MMD2 | R-MMU-75205   | Dissolution of Fibrin Clot                                        | -4.1 | 34 | 9.8 |
| MMD2 | ko00900       | Terpenoid backbone biosynthesis                                   | -6.2 | 30 | 12  |

|      |               |                                                                                            |      |    |     |
|------|---------------|--------------------------------------------------------------------------------------------|------|----|-----|
| MMD2 | GO:0006614    | SRP-dependent cotranslational protein targeting to membrane                                | -5.1 | 30 | 11  |
| MMD2 | GO:0006613    | cotranslational protein targeting to membrane                                              | -5   | 29 | 10  |
| MMD2 | GO:0044548    | S100 protein binding                                                                       | -3.9 | 29 | 9.1 |
| MMD2 | mmu00900      | Terpenoid backbone biosynthesis                                                            | -6.1 | 28 | 12  |
| MMD2 | GO:0015002    | heme-copper terminal oxidase activity                                                      | -4.7 | 25 | 9.6 |
| MMD2 | GO:0004129    | cytochrome-c oxidase activity                                                              | -4.7 | 25 | 9.6 |
| MMD2 | GO:0016676    | oxidoreductase activity, acting on a heme group of donors, oxygen as acceptor              | -4.7 | 25 | 9.6 |
| MMD2 | GO:0016675    | oxidoreductase activity, acting on a heme group of donors                                  | -4.7 | 24 | 9.4 |
| MMD2 | GO:1900221    | regulation of amyloid-beta clearance                                                       | -3.6 | 24 | 8.2 |
| MMD2 | GO:0016126    | sterol biosynthetic process                                                                | -9.6 | 22 | 14  |
| MMD2 | GO:0006695    | cholesterol biosynthetic process                                                           | -8.6 | 22 | 13  |
| MMD3 | GO:0055131    | C3HC4-type RING finger domain binding                                                      | -5   | 57 | 13  |
| MMD3 | GO:0032557    | pyrimidine ribonucleotide binding                                                          | -5   | 57 | 13  |
| MMD3 | GO:1905323    | telomerase holoenzyme complex assembly                                                     | -4.7 | 48 | 12  |
| MMD3 | R-MMU-3371568 | Attenuation phase                                                                          | -8.7 | 44 | 16  |
| MMD3 | GO:0097201    | negative regulation of transcription from RNA polymerase II promoter in response to stress | -6.8 | 37 | 13  |
| MMD3 | GO:0031545    | peptidyl-proline 4-dioxygenase activity                                                    | -4.2 | 36 | 10  |

|      |            |                                                                               |      |    |     |
|------|------------|-------------------------------------------------------------------------------|------|----|-----|
| MMD3 | GO:0018401 | peptidyl-proline hydroxylation to 4-hydroxy-L-proline                         | -5.4 | 35 | 12  |
| MMD3 | GO:0019471 | 4-hydroxyproline metabolic process                                            | -5.3 | 32 | 11  |
| MMD3 | CORUM:414  | (ER)-localized multiprotein complex, in absence of Ig heavy chains            | -4   | 32 | 9.5 |
| MMD3 | GO:0060426 | lung vasculature development                                                  | -4   | 32 | 9.5 |
| MMD3 | GO:0051085 | chaperone cofactor-dependent protein refolding                                | -11  | 29 | 16  |
| MMD3 | M00002     | Glycolysis, core module involving three-carbon compounds                      | -5.1 | 29 | 11  |
| MMD3 | mmu_M00002 | Glycolysis, core module involving three-carbon compounds                      | -5.1 | 29 | 11  |
| MMD3 | GO:0015911 | plasma membrane long-chain fatty acid transport                               | -3.9 | 29 | 9   |
| MMD3 | GO:1903748 | negative regulation of establishment of protein localization to mitochondrion | -3.9 | 29 | 9   |
| MMD3 | CORUM:413  | (ER)-localized multiprotein complex, Ig heavy chains associated               | -3.9 | 29 | 9   |
| MMD3 | GO:1902001 | fatty acid transmembrane transport                                            | -3.9 | 29 | 9   |
| MMD3 | GO:0036462 | TRAIL-activated apoptotic signaling pathway                                   | -3.9 | 29 | 9   |
| MMD3 | GO:0042026 | protein refolding                                                             | -6   | 27 | 11  |
| MMD3 | GO:0019511 | peptidyl-proline hydroxylation                                                | -5   | 27 | 10  |
| MMD4 | GO:0030430 | host cell cytoplasm                                                           | -9.5 | 52 | 17  |
| MMD4 | GO:0033655 | host cell cytoplasm part                                                      | -9.5 | 52 | 17  |

|      |            |                                                                              |      |    |     |
|------|------------|------------------------------------------------------------------------------|------|----|-----|
| MMD4 | GO:0020003 | symbiont-containing vacuole                                                  | -9.5 | 52 | 17  |
| MMD4 | GO:0043656 | intracellular region of host                                                 | -9.5 | 52 | 17  |
| MMD4 | GO:0033646 | host intracellular part                                                      | -9.5 | 52 | 17  |
| MMD4 | GO:0020005 | symbiont-containing vacuole membrane                                         | -7.8 | 49 | 15  |
| MMD4 | GO:0033643 | host cell part                                                               | -9.1 | 47 | 17  |
| MMD4 | GO:1990111 | spermatoproteasome complex                                                   | -4.7 | 47 | 12  |
| MMD4 | GO:0060335 | positive regulation of interferon-gamma-mediated signaling pathway           | -6.1 | 45 | 13  |
| MMD4 | GO:0060332 | positive regulation of response to interferon-gamma                          | -6.1 | 45 | 13  |
| MMD4 | GO:0065010 | extracellular membrane-bounded organelle                                     | -8.8 | 43 | 16  |
| MMD4 | GO:0043657 | host cell                                                                    | -8.5 | 39 | 15  |
| MMD4 | GO:0018995 | host                                                                         | -8.5 | 39 | 15  |
| MMD4 | GO:0097199 | cysteine-type endopeptidase activity involved in apoptotic signaling pathway | -5.8 | 39 | 12  |
| MMD4 | GO:0035458 | cellular response to interferon-beta                                         | -29  | 37 | 28  |
| MMD4 | GO:0035456 | response to interferon-beta                                                  | -32  | 34 | 28  |
| MMD4 | GO:0060333 | interferon-gamma-mediated signaling pathway                                  | -12  | 34 | 17  |
| MMD4 | GO:0039530 | MDA-5 signaling pathway                                                      | -4.2 | 34 | 9.8 |
| MMD4 | GO:0042270 | protection from natural killer cell mediated cytotoxicity                    | -4.2 | 34 | 9.8 |
| MMD4 | GO:0032819 | positive regulation of natural killer cell proliferation                     | -4.2 | 34 | 9.8 |

|      |               |                                                                     |      |    |     |
|------|---------------|---------------------------------------------------------------------|------|----|-----|
| MMD5 | GO:1990379    | lipid transport across blood brain barrier                          | -5.2 | 71 | 14  |
| MMD5 | GO:1900223    | positive regulation of amyloid-beta clearance                       | -4.9 | 61 | 13  |
| MMD5 | GO:0045236    | CXCR chemokine receptor binding                                     | -7.3 | 47 | 15  |
| MMD5 | GO:0044754    | autolysosome                                                        | -5.9 | 47 | 14  |
| MMD5 | GO:0002604    | regulation of dendritic cell antigen processing and presentation    | -4.6 | 47 | 12  |
| MMD5 | GO:0005767    | secondary lysosome                                                  | -7.2 | 44 | 15  |
| MMD5 | GO:0033700    | phospholipid efflux                                                 | -4.3 | 39 | 11  |
| MMD5 | GO:0008035    | high-density lipoprotein particle binding                           | -4.3 | 39 | 11  |
| MMD5 | GO:0002468    | dendritic cell antigen processing and presentation                  | -4.3 | 39 | 11  |
| MMD5 | GO:0030169    | low-density lipoprotein particle binding                            | -6.6 | 35 | 13  |
| MMD5 | GO:2000343    | positive regulation of chemokine (C-X-C motif) ligand 2 production  | -4.1 | 35 | 10  |
| MMD5 | GO:0006750    | glutathione biosynthetic process                                    | -4.1 | 35 | 10  |
| MMD5 | GO:1900221    | regulation of amyloid-beta clearance                                | -5.3 | 33 | 11  |
| MMD5 | R-MMU-8964038 | LDL clearance                                                       | -5.3 | 33 | 11  |
| MMD5 | GO:0010744    | positive regulation of macrophage derived foam cell differentiation | -4   | 33 | 9.6 |
| MMD5 | mmu_M00002    | Glycolysis, core module involving three-carbon compounds            | -4   | 33 | 9.6 |
| MMD5 | GO:0034362    | low-density lipoprotein particle                                    | -4   | 33 | 9.6 |

|      |              |                                                                                   |      |    |     |
|------|--------------|-----------------------------------------------------------------------------------|------|----|-----|
| MMD5 | M00002       | Glycolysis, core module involving three-carbon compounds                          | -4   | 33 | 9.6 |
| MMD5 | GO:0071813   | lipoprotein particle binding                                                      | -8.8 | 32 | 15  |
| MMD5 | GO:0071814   | protein-lipid complex binding                                                     | -8.8 | 32 | 15  |
| TAM1 | GO:1902566   | regulation of eosinophil activation                                               | -5.6 | 84 | 16  |
| TAM1 | GO:0042613   | MHC class II protein complex                                                      | -10  | 74 | 21  |
| TAM1 | GO:0031727   | CCR2 chemokine receptor binding                                                   | -5.2 | 67 | 14  |
| TAM1 | GO:0019886   | antigen processing and presentation of exogenous peptide antigen via MHC class II | -12  | 56 | 21  |
| TAM1 | GO:0023026   | MHC class II protein complex binding                                              | -4.9 | 56 | 13  |
| TAM1 | GO:0043307   | eosinophil activation                                                             | -4.9 | 56 | 13  |
| TAM1 | R-MMU-173623 | Classical antibody-mediated complement activation                                 | -4.9 | 56 | 13  |
| TAM1 | GO:0098883   | synapse pruning                                                                   | -6.1 | 50 | 14  |
| TAM1 | GO:0002495   | antigen processing and presentation of peptide antigen via MHC class II           | -13  | 48 | 20  |
| TAM1 | GO:1900223   | positive regulation of amyloid-beta clearance                                     | -4.6 | 48 | 12  |
| TAM1 | CORUM:51     | CCT complex (chaperonin containing TCP1 complex)                                  | -4.6 | 48 | 12  |
| TAM1 | CORUM:132    | CCT complex (chaperonin containing TCP1 complex)                                  | -4.6 | 48 | 12  |
| TAM1 | CORUM:52     | CCT complex (chaperonin containing TCP1 complex)                                  | -4.6 | 48 | 12  |

|      |            |                                                                                           |      |    |     |
|------|------------|-------------------------------------------------------------------------------------------|------|----|-----|
| TAM1 | GO:0002478 | antigen processing and presentation of exogenous peptide antigen                          | -16  | 46 | 22  |
| TAM1 | GO:0002504 | antigen processing and presentation of peptide or polysaccharide antigen via MHC class II | -13  | 46 | 20  |
| TAM1 | GO:0042611 | MHC protein complex                                                                       | -13  | 44 | 19  |
| TAM1 | CORUM:3072 | CCT complex (chaperonin containing TCP1 complex), testis specific                         | -4.4 | 42 | 11  |
| TAM1 | GO:0019884 | antigen processing and presentation of exogenous antigen                                  | -14  | 36 | 19  |
| TAM1 | GO:1903977 | positive regulation of glial cell migration                                               | -5.4 | 34 | 11  |
| TAM1 | GO:1904851 | positive regulation of establishment of protein localization to telomere                  | -4.1 | 34 | 9.8 |
| TAM2 | GO:0046149 | pigment catabolic process                                                                 | -5.1 | 58 | 13  |
| TAM2 | GO:0006787 | porphyrin-containing compound catabolic process                                           | -5.1 | 58 | 13  |
| TAM2 | GO:0150062 | complement-mediated synapse pruning                                                       | -5.1 | 58 | 13  |
| TAM2 | GO:0042167 | heme catabolic process                                                                    | -5.1 | 58 | 13  |
| TAM2 | GO:1990379 | lipid transport across blood brain barrier                                                | -6.4 | 51 | 14  |
| TAM2 | GO:0033015 | tetrapyrrole catabolic process                                                            | -4.7 | 46 | 12  |
| TAM2 | GO:0031727 | CCR2 chemokine receptor binding                                                           | -4.7 | 46 | 12  |
| TAM2 | GO:0031904 | endosome lumen                                                                            | -4.7 | 46 | 12  |
| TAM2 | GO:0098883 | synapse pruning                                                                           | -7.4 | 43 | 14  |

|      |               |                                                        |      |     |     |
|------|---------------|--------------------------------------------------------|------|-----|-----|
| TAM2 | R-MMU-173623  | Classical antibody-mediated complement activation      | -4.4 | 38  | 11  |
| TAM2 | GO:0032489    | regulation of Cdc42 protein signal transduction        | -4.4 | 38  | 11  |
| TAM2 | R-MMU-8866427 | VLDLR internalisation and degradation                  | -6.8 | 35  | 13  |
| TAM2 | R-MMU-190873  | Gap junction degradation                               | -5.5 | 34  | 11  |
| TAM2 | R-MMU-196025  | Formation of annular gap junctions                     | -5.5 | 34  | 11  |
| TAM2 | GO:1900223    | positive regulation of amyloid-beta clearance          | -4.1 | 33  | 9.7 |
| TAM2 | GO:0010886    | positive regulation of cholesterol storage             | -4.1 | 33  | 9.7 |
| TAM2 | GO:0110096    | cellular response to aldehyde                          | -5.3 | 31  | 11  |
| TAM2 | R-MMU-177504  | Retrograde neurotrophin signalling                     | -5.3 | 31  | 11  |
| TAM2 | GO:0030132    | clathrin coat of coated pit                            | -8.8 | 30  | 14  |
| TAM2 | GO:1904350    | regulation of protein catabolic process in the vacuole | -3.9 | 29  | 9   |
| TAM3 | R-MMU-5653656 | Vesicle-mediated transport                             | -2.3 | 8.3 | 4.5 |
| TAM3 | GO:0031347    | regulation of defense response                         | -2.1 | 7   | 4   |
| TAM4 | GO:0031262    | Ndc80 complex                                          | -6.6 | 45  | 13  |
| TAM4 | GO:0000942    | condensed nuclear chromosome outer kinetochore         | -6.6 | 45  | 13  |

|      |                   |                                                                             |      |    |     |
|------|-------------------|-----------------------------------------------------------------------------|------|----|-----|
| TAM4 | CORUM:1122        | Smcb-Smcd-PW29 complex                                                      | -5   | 45 | 11  |
| TAM4 | GO:0032133        | chromosome passenger complex                                                | -7.5 | 37 | 13  |
| TAM4 | GO:0051256        | mitotic spindle midzone assembly                                            | -7.5 | 37 | 13  |
| TAM4 | R-MMU-<br>2980767 | Activation of NIMA Kinases NEK9,<br>NEK6, NEK7                              | -5.9 | 36 | 12  |
| TAM4 | CORUM:47          | DNA polymerase alpha-primase complex                                        | -4.4 | 34 | 9.9 |
| TAM4 | M00261            | DNA polymerase alpha / primase complex                                      | -4.4 | 34 | 9.9 |
| TAM4 | GO:1905340        | regulation of protein localization to<br>kinetochore                        | -4.4 | 34 | 9.9 |
| TAM4 | GO:0000799        | nuclear condensin complex                                                   | -4.4 | 34 | 9.9 |
| TAM4 | GO:1905342        | positive regulation of protein localization<br>to kinetochore               | -4.4 | 34 | 9.9 |
| TAM4 | mmu_M00261        | DNA polymerase alpha / primase complex                                      | -4.4 | 34 | 9.9 |
| TAM4 | CORUM:1110        | DNA polymerase alpha-primase complex                                        | -4.4 | 34 | 9.9 |
| TAM4 | GO:0032564        | dATP binding                                                                | -4.4 | 34 | 9.9 |
| TAM4 | GO:0005658        | alpha DNA polymerase:primase complex                                        | -4.4 | 34 | 9.9 |
| TAM4 | GO:0051987        | positive regulation of attachment of<br>spindle microtubules to kinetochore | -7   | 32 | 12  |
| TAM4 | GO:0010032        | meiotic chromosome condensation                                             | -7   | 32 | 12  |
| TAM4 | CORUM:309         | RC complex                                                                  | -7   | 32 | 12  |
| TAM4 | GO:0000022        | mitotic spindle elongation                                                  | -7   | 32 | 12  |
| TAM4 | GO:0000778        | condensed nuclear chromosome<br>kinetochore                                 | -16  | 30 | 19  |
| DC1  | GO:0042613        | MHC class II protein complex                                                | -16  | 59 | 23  |

|     |            |                                                                                   |      |    |     |
|-----|------------|-----------------------------------------------------------------------------------|------|----|-----|
| DC1 | GO:0023026 | MHC class II protein complex binding                                              | -11  | 59 | 19  |
| DC1 | GO:0023029 | MHC class Ib protein binding                                                      | -7.1 | 59 | 15  |
| DC1 | GO:0045338 | farnesyl diphosphate metabolic process                                            | -4.7 | 44 | 11  |
| DC1 | GO:0043435 | response to corticotropin-releasing hormone                                       | -4.7 | 44 | 11  |
| DC1 | GO:2001199 | negative regulation of dendritic cell differentiation                             | -4.7 | 44 | 11  |
| DC1 | GO:0002584 | negative regulation of antigen processing and presentation of peptide antigen     | -4.7 | 44 | 11  |
| DC1 | GO:0071376 | cellular response to corticotropin-releasing hormone stimulus                     | -4.7 | 44 | 11  |
| DC1 | GO:0023023 | MHC protein complex binding                                                       | -12  | 39 | 17  |
| DC1 | GO:1990111 | spermatoproteasome complex                                                        | -4.3 | 35 | 10  |
| DC1 | GO:0042611 | MHC protein complex                                                               | -17  | 33 | 20  |
| DC1 | GO:0042270 | protection from natural killer cell mediated cytotoxicity                         | -5.6 | 33 | 11  |
| DC1 | GO:0002583 | regulation of antigen processing and presentation of peptide antigen              | -5.6 | 33 | 11  |
| DC1 | GO:0002578 | negative regulation of antigen processing and presentation                        | -5.6 | 33 | 11  |
| DC1 | GO:0019886 | antigen processing and presentation of exogenous peptide antigen via MHC class II | -10  | 29 | 15  |
| DC1 | CORUM:676  | Metallothionein-3 complex                                                         | -4   | 29 | 9.1 |

|     |               |                                                                                                                 |      |    |     |
|-----|---------------|-----------------------------------------------------------------------------------------------------------------|------|----|-----|
| DC1 | GO:0002478    | antigen processing and presentation of exogenous peptide antigen                                                | -14  | 26 | 17  |
| DC1 | GO:0002495    | antigen processing and presentation of peptide antigen via MHC class II                                         | -11  | 25 | 15  |
| DC1 | R-MMU-8934593 | Regulation of RUNX1 Expression and Activity                                                                     | -3.8 | 25 | 8.4 |
| DC1 | GO:2001198    | regulation of dendritic cell differentiation                                                                    | -3.8 | 25 | 8.4 |
| DC2 | CORUM:6279    | p65-IkappaBalpha-beta-arrestin-iNOS complex                                                                     | -4.4 | 29 | 9.2 |
| DC2 | GO:0046979    | TAP2 binding                                                                                                    | -4.4 | 29 | 9.2 |
| DC2 | GO:0002485    | antigen processing and presentation of endogenous peptide antigen via MHC class I via ER pathway, TAP-dependent | -4.4 | 29 | 9.2 |
| DC2 | R-MMU-8984722 | Interleukin-35 Signalling                                                                                       | -9.4 | 26 | 13  |
| DC2 | GO:0046978    | TAP1 binding                                                                                                    | -3.8 | 22 | 7.9 |
| DC2 | GO:2001199    | negative regulation of dendritic cell differentiation                                                           | -3.8 | 22 | 7.9 |
| DC2 | R-MMU-9020591 | Interleukin-12 signaling                                                                                        | -6.1 | 21 | 9.9 |
| DC2 | GO:0046977    | TAP binding                                                                                                     | -9.1 | 20 | 12  |
| DC2 | GO:0062061    | TAP complex binding                                                                                             | -6.9 | 20 | 10  |
| DC2 | CORUM:2836    | Profilin 1 complex                                                                                              | -4.7 | 20 | 8.6 |
| DC2 | GO:0042824    | MHC class I peptide loading complex                                                                             | -9.6 | 18 | 12  |
| DC2 | GO:0005131    | growth hormone receptor binding                                                                                 | -3.4 | 18 | 7   |

|     |               |                                                                                                          |      |    |     |
|-----|---------------|----------------------------------------------------------------------------------------------------------|------|----|-----|
| DC2 | GO:1902951    | negative regulation of dendritic spine maintenance                                                       | -3.4 | 18 | 7   |
| DC2 | GO:0031904    | endosome lumen                                                                                           | -3.4 | 18 | 7   |
| DC2 | GO:0060397    | JAK-STAT cascade involved in growth hormone signaling pathway                                            | -3.4 | 18 | 7   |
| DC2 | R-MMU-9020958 | Interleukin-21 signaling                                                                                 | -4.4 | 17 | 7.9 |
| DC2 | CORUM:5742    | Multicomponent signaling complex, anti-CD40 stimulated,(Birc2, Birc3, Cd40, Ikbkg, Map3k1, Traf2, Ube2n) | -4.4 | 17 | 7.9 |
| DC2 | GO:0042270    | protection from natural killer cell mediated cytotoxicity                                                | -4.4 | 17 | 7.9 |
| DC2 | R-MMU-1810476 | RIP-mediated NFkB activation via ZBP1                                                                    | -6.2 | 16 | 9.4 |
| DC2 | GO:0042610    | CD8 receptor binding                                                                                     | -6.2 | 16 | 9.4 |
| T   | M00285        | MCM complex                                                                                              | -7.4 | 17 | 9.8 |
| T   | mmu_M00285    | MCM complex                                                                                              | -7.4 | 17 | 9.8 |
| T   | CORUM:122     | MCM complex                                                                                              | -7.4 | 17 | 9.8 |
| T   | R-MMU-156842  | Eukaryotic Translation Elongation                                                                        | -6.2 | 17 | 9   |
| T   | GO:0000275    | mitochondrial proton-transporting ATP synthase complex, catalytic core F(1)                              | -6.2 | 17 | 9   |
| T   | GO:0023024    | MHC class I protein complex binding                                                                      | -6.2 | 17 | 9   |
| T   | CORUM:5310    | Cd3d-Cd3g-Cd3e-Cd247 complex                                                                             | -4.9 | 17 | 8   |

|   |                  |                                                                                                        |      |    |     |
|---|------------------|--------------------------------------------------------------------------------------------------------|------|----|-----|
| T | GO:0032831       | positive regulation of CD4-positive,<br>CD25-positive, alpha-beta regulatory T<br>cell differentiation | -3.7 | 17 | 7   |
| T | GO:0099040       | ceramide translocation                                                                                 | -3.7 | 17 | 7   |
| T | CORUM:2874       | Slam-SAP-FynT complex                                                                                  | -3.7 | 17 | 7   |
| T | GO:1990518       | single-stranded DNA-dependent ATP-<br>dependent 3'-5' DNA helicase activity                            | -3.7 | 17 | 7   |
| T | GO:0043140       | ATP-dependent 3'-5' DNA helicase<br>activity                                                           | -3.7 | 17 | 7   |
| T | GO:0099038       | ceramide-translocating ATPase activity                                                                 | -3.7 | 17 | 7   |
| T | GO:0019976       | interleukin-2 binding                                                                                  | -3.7 | 17 | 7   |
| T | CORUM:2568       | Slam-SAP-FynT complex                                                                                  | -3.7 | 17 | 7   |
| T | R-MMU-<br>202430 | Translocation of ZAP-70 to<br>Immunological synapse                                                    | -9   | 15 | 11  |
| T | GO:1990446       | U1 snRNP binding                                                                                       | -7.8 | 15 | 9.9 |
| T | GO:0005688       | U6 snRNP                                                                                               | -7.8 | 15 | 9.9 |
| T | M00397           | Lsm 1-7 complex                                                                                        | -6.6 | 15 | 9   |
| T | CORUM:132        | CCT complex (chaperonin containing<br>TCP1 complex)                                                    | -6.6 | 15 | 9   |
| B | R-MMU-<br>156842 | Eukaryotic Translation Elongation                                                                      | -7.5 | 31 | 12  |
| B | CORUM:161        | SWAP complex                                                                                           | -6   | 31 | 11  |
| B | GO:0002344       | B cell affinity maturation                                                                             | -4.5 | 31 | 9.5 |
| B | GO:0002343       | peripheral B cell selection                                                                            | -4.5 | 31 | 9.5 |

|   |                   |                                                                                         |      |    |     |
|---|-------------------|-----------------------------------------------------------------------------------------|------|----|-----|
| B | GO:0042613        | MHC class II protein complex                                                            | -11  | 28 | 15  |
| B | GO:0019815        | B cell receptor complex                                                                 | -8.1 | 27 | 12  |
| B | GO:0023026        | MHC class II protein complex binding                                                    | -6.7 | 26 | 11  |
| B | GO:0035061        | interchromatin granule                                                                  | -3.9 | 23 | 8.1 |
| B | GO:1902308        | regulation of peptidyl-serine<br>dephosphorylation                                      | -3.5 | 19 | 7.2 |
| B | GO:0051025        | negative regulation of immunoglobulin<br>secretion                                      | -3.5 | 19 | 7.2 |
| B | GO:0002339        | B cell selection                                                                        | -3.5 | 19 | 7.2 |
| B | GO:0070087        | chromo shadow domain binding                                                            | -3.5 | 19 | 7.2 |
| B | GO:0035022        | positive regulation of Rac protein signal<br>transduction                               | -3.5 | 19 | 7.2 |
| B | R-MMU-<br>5690714 | CD22 mediated BCR regulation                                                            | -3.5 | 19 | 7.2 |
| B | GO:0031618        | nuclear pericentric heterochromatin                                                     | -5.4 | 17 | 8.9 |
| B | GO:1990446        | U1 snRNP binding                                                                        | -4.2 | 16 | 7.5 |
| B | GO:0061470        | T follicular helper cell differentiation                                                | -3.2 | 16 | 6.5 |
| B | GO:0019886        | antigen processing and presentation of<br>exogenous peptide antigen via MHC class<br>II | -6.5 | 14 | 9.2 |
| B | CORUM:572         | PYR complex                                                                             | -4.7 | 13 | 7.5 |
| B | GO:0023023        | MHC protein complex binding                                                             | -4.7 | 13 | 7.5 |

342

343 **Table S3. FPKM values of S100a8/S100a9 and corresponding receptors.**

| Gene name     | LLC-in vitro 1 | LLC-in vitro 2 | LLC-in vitro 3 | LLC-in vitro 4 | LLC-in vitro 5 | LLC-in vivo 1 | LLC-in vivo 2 | LLC-in vivo 3 | LLC-in vivo 4 | LLC-in vivo 5 |
|---------------|----------------|----------------|----------------|----------------|----------------|---------------|---------------|---------------|---------------|---------------|
| <i>S100a8</i> | 0.01           | 1.07795        | 0.01           | 0.47757        | 0.14327        | 5.82864       | 0.79694       | 1.9622        | 3.01905       | 5.20144       |
| <i>S100a9</i> | 0.01           | 0.01           | 0.01           | 0.01           | 0.01           | 2.96642       | 0.41995       | 1.4042        | 2.03824       | 4.14339       |
| <i>Tlr4</i>   | 17.8483        | 28.6618        | 16.4358        | 45.4713        | 35.9133        | 7.06859       | 9.60603       | 8.8262        | 9.60366       | 12.4807       |
| <i>Bsg</i>    | 216.754        | 526.04         | 262.269        | 568.808        | 453.189        | 500.371       | 287.381       | 281.49        | 398.37        | 328.438       |
| <i>Ager</i>   | 0.56347        | 0.11518        | 0.80036        | 0.62453        | 0.28791        | 0.55943       | 1.09225       | 2.553         | 0.53609       | 0.69442       |

344

345 **Table S4. Top 10 significantly enriched pathways from GO and KEGG enrichment**  
346 **analysis of WTA data of LLC cells.**

| GO            | Description                                | LogP | Enrichment | Z-score |
|---------------|--------------------------------------------|------|------------|---------|
| GO:1901342    | regulation of vasculature development      | -13  | 5.4        | 10      |
| GO:0045765    | regulation of angiogenesis                 | -12  | 5.6        | 10      |
| GO:0001568    | blood vessel development                   | -12  | 3.7        | 9.1     |
| ko05230       | Central carbon metabolism in cancer        | -9.8 | 12         | 11      |
| ko04668       | TNF signaling pathway                      | -8.1 | 8.1        | 9.1     |
| R-MMU-1280215 | Cytokine Signaling in Immune system        | -5.6 | 2.9        | 5.7     |
| GO:0043408    | regulation of MAPK cascade                 | -5.3 | 2.6        | 5.3     |
| GO:0070372    | regulation of ERK1 and ERK2 cascade        | -4.6 | 3.4        | 5.3     |
| GO:0001819    | positive regulation of cytokine production | -4.5 | 2.8        | 5       |
| GO:0001558    | regulation of cell growth                  | -4.4 | 2.9        | 4.9     |

347

348 **Table S5. Top 10 significantly enriched pathways from GO and KEGG enrichment**  
349 **analysis of scRNA-seq data and WTA data of GMD, MMD and TAMs.**

| GO         | Description                                                  | _LogP_CD<br>45scRNAseq | _LogP_mR<br>NAseq-<br>GMD | _LogP_mR<br>NAseq-<br>MMD | _LogP_mRNA<br>seq-TAM |
|------------|--------------------------------------------------------------|------------------------|---------------------------|---------------------------|-----------------------|
| GO:0071347 | cellular response to interleukin-1                           | -3.6292191             | -3.6924162                | -7.6439643                | -3.2133256            |
| GO:1904951 | positive regulation of establishment of protein localization | -6.1902007             | -3.8007701                | -6.7694037                | -2.1373743            |
| ko04657    | IL-17 signaling pathway                                      | -7.9299785             | -3.2933656                | -10.99263                 | -2.8586514            |
| GO:0000165 | MAPK cascade                                                 | -8.7034568             | -2.5237574                | -7.7411943                | -2.8670897            |
| GO:0097529 | myeloid leukocyte migration                                  | -12.53702              | -8.6046712                | -5.1965013                | -3.0926284            |
| GO:0019221 | cytokine-mediated signaling pathway                          | -10.835677             | -4.7070109                | -9.1717688                | -3.8588184            |
| GO:0006954 | inflammatory response                                        | -15.606855             | -8.4392808                | -19.346601                | -3.5283674            |
| GO:0050900 | leukocyte migration                                          | -16.03232              | -8.2135698                | -7.0066308                | -4.8721725            |
| GO:0050673 | epithelial cell proliferation                                | -4.3945533             | -2.1704342                | -3.5826776                | -2.4066515            |
| GO:0009725 | response to hormone                                          | -4.4851442             | -2.2287992                | -3.0013683                | -4.4607612            |

350

351

353 **Table S6. WTA indicated gene expression of MMPs in LLC.**

| Gene name    | WT78-<br>LLC_R1<br>(paired) (GE)<br>- RPKM | WT83-<br>LLC_R1<br>(paired) (GE)<br>- RPKM | WT82-<br>LLC_R1<br>(paired) (GE)<br>- RPKM | KO79-<br>LLC_R1<br>(paired) (GE)<br>- RPKM | KO84-<br>LLC_R1<br>(paired) (GE)<br>- RPKM | KO81-<br>LLC_R1<br>(paired) (GE)<br>- RPKM |
|--------------|--------------------------------------------|--------------------------------------------|--------------------------------------------|--------------------------------------------|--------------------------------------------|--------------------------------------------|
| <i>Mmp10</i> | 0                                          | 0.38141553                                 | 0.60154053                                 | 2.50124789                                 | 0.48660632                                 | 0.20807941                                 |
| <i>Mmp11</i> | 2.12912295                                 | 1.96690323                                 | 2.57126968                                 | 2.61113628                                 | 2.3356084                                  | 2.58605835                                 |
| <i>Mmp12</i> | 0.18677203                                 | 0.45622082                                 | 0.8489396                                  | 3.61938645                                 | 0.88802184                                 | 0.16670749                                 |
| <i>Mmp13</i> | 0.04767706                                 | 0.18428663                                 | 0.12492564                                 | 0.27497506                                 | 0.08089846                                 | 0.04468297                                 |
| <i>Mmp14</i> | 36.989615                                  | 32.2354347                                 | 31.5931334                                 | 44.3295353                                 | 32.1254212                                 | 36.9800087                                 |
| <i>Mmp15</i> | 0                                          | 0                                          | 0.01459845                                 | 0                                          | 0.00526391                                 | 0.00664557                                 |
| <i>Mmp16</i> | 0.08015144                                 | 0                                          | 0.00233785                                 | 0                                          | 0                                          | 0.00292667                                 |
| <i>Mmp17</i> | 0                                          | 0.0191762                                  | 0.00212234                                 | 0                                          | 0                                          | 0.00797065                                 |
| <i>Mmp19</i> | 6.12660585                                 | 3.94092793                                 | 3.61365111                                 | 4.61907934                                 | 5.64401149                                 | 5.45526013                                 |
| <i>Mmp1a</i> | 0                                          | 0.08112618                                 | 0.09090917                                 | 0.09441807                                 | 0.09348388                                 | 0.05058057                                 |
| <i>Mmp1b</i> | 0                                          | 0.16997866                                 | 0.08935928                                 | 0.25362607                                 | 0.08394471                                 | 0.11775371                                 |
| <i>Mmp2</i>  | 12.9593779                                 | 13.0164556                                 | 14.9160004                                 | 23.6692744                                 | 14.1254292                                 | 14.0829473                                 |
| <i>Mmp20</i> | 0                                          | 0                                          | 0.00414653                                 | 0                                          | 0.00411168                                 | 0.01557272                                 |
| <i>Mmp21</i> | 0                                          | 0.02209357                                 | 0.0146713                                  | 0                                          | 0                                          | 0                                          |
| <i>Mmp23</i> | 0                                          | 0.14313057                                 | 0.1188079                                  | 0.06150697                                 | 0.06597328                                 | 0.22012306                                 |
| <i>Mmp24</i> | 0.01973073                                 | 0.15253078                                 | 0.27696091                                 | 0.14338296                                 | 0.160072                                   | 0.21001234                                 |
| <i>Mmp25</i> | 0                                          | 0.00774087                                 | 0.0102807                                  | 0.03880866                                 | 0.0101943                                  | 0.02895769                                 |
| <i>Mmp27</i> | 0                                          | 0                                          | 0.00616726                                 | 0                                          | 0                                          | 0                                          |

|              |            |            |            |            |            |            |
|--------------|------------|------------|------------|------------|------------|------------|
| <i>Mmp28</i> | 2.76898363 | 1.69681401 | 1.78767165 | 2.04883088 | 1.13521096 | 1.30432822 |
| <i>Mmp3</i>  | 7.8073106  | 10.0630246 | 11.9609379 | 43.8229848 | 16.0365158 | 5.26275702 |
| <i>Mmp7</i>  | 0          | 0          | 0          | 0.0137642  | 0          | 0          |
| <i>Mmp8</i>  | 0.1051058  | 0          | 0          | 0          | 0          | 0          |
| <i>Mmp9</i>  | 0.63158283 | 0.31736426 | 0.45594253 | 0.19670161 | 0.30944471 | 0.26382713 |
